# Supplementary material
Source: PubMed Central journal article supplement (PMC6084075)

## Supplementary Information

### Succinct synthesis of saturated hydroxy fatty acids and *in vitro* evaluation of all hydroxylauric acids at FFA1, FFA4 and GPR84

Mads Holmgaard Kaspersen, Laura Jenkins, Julia Dunlop, Graeme Milligan, Trond Ulven\*

<sup>a</sup> Department of Physics, Chemistry and Pharmacy, University of Southern Denmark, Odense, Denmark

<sup>b</sup> Centre for Translational Pharmacology, Institute of Molecular, Cell and Systems Biology, College of Medical,  
Veterinary and Life Sciences, University of Glasgow, Glasgow, United Kingdom

\*Email: [ulven@sdu.dk](mailto:ulven@sdu.dk)

#### Contents

|                               |   |
|-------------------------------|---|
| Synthetic procedures          | 2 |
| Concentration-response curves | 4 |
| References                    | 5 |
| NMR spectra                   | 6 |

## Synthetic procedures

**2-Hydroxylauric acid (2-HLA).**<sup>1</sup> Lauric acid (200 mg, 1.0 mmol) was dissolved in  $\text{SOCl}_2$  (0.36 mL) and the reaction was heated to 50 °C for 15 min. Bromine (0.25 mL, 5.0 mmol) was added and the reaction was stirred at 50 °C for 22 h. The reaction mixture was cooled to 0 °C and concentrated, aqueous  $\text{Na}_2\text{SO}_3$  was added until the disappearance of the colour, and the solution was acidified to pH 1 with 2M HCl. The aqueous phase was extracted with dichloromethane (3×10 mL). The combined organic phases were dried over  $\text{Na}_2\text{SO}_4$  and evaporated *in vacuo*. The crude product was dissolved in 2M NaOH (4.75 mL) and heated to 85 °C for 17 h. The reaction mixture was cooled to 0 °C and acidified with concentrated HCl to pH 1. The reaction mixture was extracted with ethyl acetate (3×30 mL). The combined organic phases were dried over  $\text{Na}_2\text{SO}_4$  and evaporated *in vacuo*. The crude was purified by column chromatography (1:1:100 MeOH:AcOH:DCM) yielding 110 mg (53%) of the product as a white solid:  $^1\text{H}$  NMR (400 MHz,  $\text{CD}_3\text{OD}$ )  $\delta$  4.02 (dd,  $J = 7.7, 4.4$  Hz, 1H), 1.73 – 1.62 (m, 1H), 1.61 – 1.50 (m, 1H), 1.39 – 1.31 (m, 2H), 1.24 (d,  $J = 18.5$  Hz, 14H), 0.82 (t,  $J = 6.9$  Hz, 3H);  $^{13}\text{C}$  NMR (101 MHz,  $\text{CD}_3\text{OD}$ )  $\delta$  178.1, 71.5, 35.4, 33.1, 30.7, 30.7, 30.6, 30.5, 30.5, 26.1, 23.7, 14.4; ESI-HRMS: ( $\text{M}+\text{Na}^+$ ) calcd for  $\text{C}_{12}\text{H}_{24}\text{NaO}_3$ : 239.1618, found: 239.1617

**Ethyl 3-oxolaurate.** NaH (40 mg, 60 % w/w, 1.0 mmol) was suspended in dry THF (4.5 mL). The suspension was cooled to 0 °C and ethyl acetoacetate (110  $\mu\text{L}$ , 0.87 mmol) was added. When bubbling had seized, *n*-butyl lithium (2.5 M in hexanes, 0.37 mL, 0.93 mmol) was added. After half an hour 1-bromooctane was added (135  $\mu\text{L}$ , 0.78 mmol), the reaction was then allowed to reach room temperature and stirred for 16 h. The reaction mixture was concentrated,  $\text{NH}_4\text{Cl}$  (sat. aq., 3 mL) was added, the pH was adjusted to 7 with aqueous HCl (1 M), and the aqueous phase was extracted with ethyl acetate (3×15 mL). The combined organic phase was dried over  $\text{Na}_2\text{SO}_4$  and evaporated *in vacuo*. The crude was purified by column chromatography (1:20 ethyl acetate:petroleum ether) yielding 180 mg (96%) of the product as a colorless oil:  $^1\text{H}$  NMR (400 MHz,  $\text{CDCl}_3$ )  $\delta$  4.20 (q,  $J = 7.1$  Hz, 2H), 3.43 (s, 2H), 2.53 (t,  $J = 7.4$  Hz, 2H), 1.64 – 1.53 (m, 2H), 1.34 – 1.24 (m, 15H), 0.88 (t,  $J = 6.9$  Hz, 3H);  $^{13}\text{C}$  NMR (101 MHz,  $\text{CDCl}_3$ )  $\delta$  203.0, 167.3, 61.3, 49.3, 43.1,

31.9, 29.4, 29.3, 29.2, 29.0, 23.5, 22.6, 14.1, 14.1. NMR is consistent with previously reported data.<sup>2</sup> Approximately 15 % of the corresponding enol was observed in the spectra.

**3-Hydroxylauric acid (3-HLA).**<sup>2</sup> Ethyl 3-oxolaurate (147 mg, 0.61 mmol) was dissolved in THF (1 mL) and absolute ethanol (0.5 mL). The solution was cooled to 0 °C, NaBH<sub>4</sub> (29 mg, 0.79 mmol) was added and the reaction was stirred for 2 h before addition of aqueous HCl (0.5 M, 6 mL) and brine (9 mL). The aqueous phase was extracted with ethyl acetate (3×15 mL). The combined organic phase was dried over Na<sub>2</sub>SO<sub>4</sub> and evaporated *in vacuo*. The crude was dissolved in THF (1.5 mL) and added LiOH•H<sub>2</sub>O (55 mg, 1.31 mmol) dissolved in H<sub>2</sub>O (0.75 mL). The reaction was stirred 21 h and then acidified to pH 1 with HCl (2 M). Brine (9 mL) was added and the aqueous phase was extracted with ethyl acetate (3×15 mL). The combined organic phase was dried over Na<sub>2</sub>SO<sub>4</sub> and concentrated *in vacuo*. The crude was purified by column chromatography (1:1:100 AcOH:MeOH:DCM) yielding the desired product as a white solid (44 mg, 36% over two steps): <sup>1</sup>H NMR (400 MHz, CD<sub>3</sub>OD) δ 4.02 – 3.93 (m, 1H), 3.73 – 3.66 (m, 1H), 2.40 (qd, J = 15.2, 6.5 Hz, 2H), 1.48 (d, J = 6.3 Hz, 2H), 1.30 (d, J = 1.8 Hz, 14H), 0.90 (t, J = 6.9 Hz, 3H); <sup>13</sup>C NMR (101 MHz, CD<sub>3</sub>OD) δ 175.7, 69.4, 49.7, 49.5, 49.2, 49.0, 48.8, 48.6, 48.4, 43.3, 38.1, 33.1, 30.7, 30.7, 30.5, 26.7, 23.7, 14.4; ESI-HRMS: calcd for C<sub>12</sub>H<sub>24</sub>NaO<sub>3</sub> (M+Na<sup>+</sup>) 239.1618, found 239.1610.

**Sodium 4-hydroxylaurate (4-HLA).**<sup>3</sup> 4-Dodecanolide (105 μL, 0.50 mmol) and NaOH (21 mg, 0.53 mmol) was dissolved in methanol (1 mL) and stirred for 24 h at room temperature. The solvent was blown away under a stream of nitrogen yielding the desired compound as a white, waxy solid (112 mg, 93 %): <sup>1</sup>H NMR (400 MHz, CD<sub>3</sub>OD) δ 3.58 – 3.50 (m, 1H), 3.35 (s, 1H), 2.35 – 2.21 (m, 2H), 1.81 – 1.72 (m, 1H), 1.70 – 1.60 (m, 1H), 1.46 – 1.28 (m, 14H), 0.90 (t, J = 6.9 Hz, 3H); <sup>13</sup>C NMR (101 MHz, CD<sub>3</sub>OD) δ 183.0, 72.9, 38.5, 35.8, 34.9, 33.1, 30.9, 30.8, 30.4, 26.9, 23.7, 14.4; ESI-HRMS: calcd for C<sub>12</sub>H<sub>24</sub>NaO<sub>3</sub> (M+Na<sup>+</sup>) 239.1618, found 239.1618.

**Sodium 5-hydroxylaurate (5-HLA).**<sup>4</sup> 5-Dodecanolide (105 μL, 0.50 mmol) and NaOH (21 mg, 0.50 mmol) was dissolved in methanol (1 mL). It was stirred for 24 h at room temperature. The solvent was blown away under a stream of nitrogen yielding the desired compound as a white solid (105 mg, 88%): <sup>1</sup>H NMR (400 MHz, CD<sub>3</sub>OD) δ 3.57 – 3.49 (m, 1H), 2.17 (t, J = 7.5 Hz, 2H), 1.79 – 1.57 (m,

2H), 1.52 – 1.27 (m, 14H), 0.90 (t,  $J = 6.9$  Hz, 3H);  $^{13}\text{C}$  NMR (101 MHz,  $\text{CD}_3\text{OD}$ )  $\delta$  182.9, 72.2, 39.1, 38.5, 38.4, 33.0, 30.9, 30.5, 26.9, 23.8, 23.7, 14.4; ESI-HRMS: ( $\text{M}+\text{Na}^+$ ) calcd for  $\text{C}_{12}\text{H}_{24}\text{NaO}_3$  239.1618, found 239.1623.

### Concentration-response curves

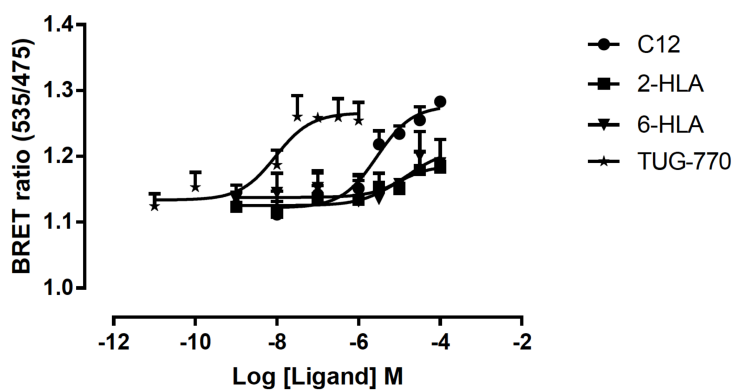

**Figure S1.** Concentration-response curves for lauric acid (C12), 2-HLA, 6-HLA and TUG-770 on FFA1.<sup>5,6</sup>

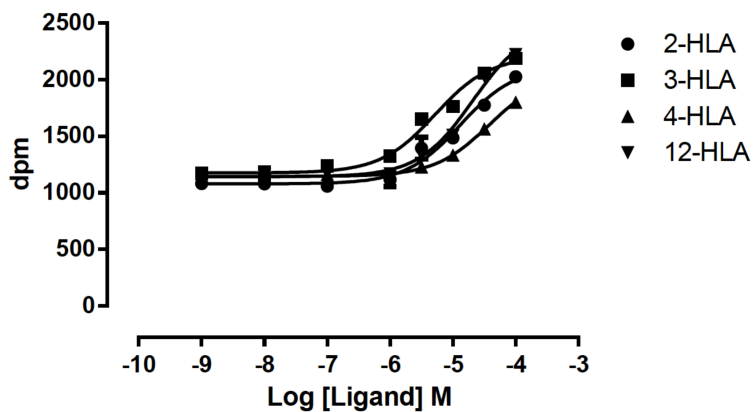

**Figure S2.** Concentration-response curves for 2-HLA, 3-HLA, 4-HLA and 12-HLA on GPR84.<sup>7</sup>

## References

1. K. Orito, Y. Seki, H. Suginome and T. Iwadare, *Bull. Chem. Soc. Jpn.*, 1989, **62**, 2013-2017.
2. I. Galleano, M. Schiedel, M. Jung, A. S. Madsen and C. A. Olsen, *J. Med. Chem.*, 2016, **59**, 1021-1031.
3. A. L. Vlasyuk, V. A. Voblikova, G. D. Gamalevich and E. P. Serebryakov, *Russ. Chem. Bull.*, 2013, **62**, 2032-2036.
4. H. Lemoine, D. Markovic and B. Deguin, *J. Org. Chem.*, 2014, **79**, 4358-4366.
5. E. Christiansen, S. V. F. Hansen, C. Urban, B. D. Hudson, E. T. Wargent, M. Grundmann, L. Jenkins, M. Zaibi, C. J. Stocker, S. Ullrich, E. Kostenis, M. U. Kassack, G. Milligan, M. A. Cawthorne and T. Ulven, *ACS Med. Chem. Lett.*, 2013, **4**, 441-445.
6. E. Christiansen, K. R. Watterson, C. J. Stocker, E. Sokol, L. Jenkins, K. Simon, M. Grundmann, R. K. Petersen, E. T. Wargent, B. D. Hudson, E. Kostenis, C. S. Ejsing, M. A. Cawthorne, G. Milligan and T. Ulven, *Br. J. Nutr.*, 2015, **113**, 1677-1688.
7. M. Suzuki, S. Takaishi, M. Nagasaki, Y. Onozawa, I. Iino, H. Maeda, T. Komai and T. Oda, *J. Biol. Chem.*, 2013, **288**, 10684-10691.

# NMR spectra

## 2-Hydroxydodecanoic acid

$^1\text{H}$  NMR (400 MHz,  $\text{CD}_3\text{OD}$ ),  $^{13}\text{C}$  NMR (101 MHz,  $\text{CD}_3\text{OD}$ )

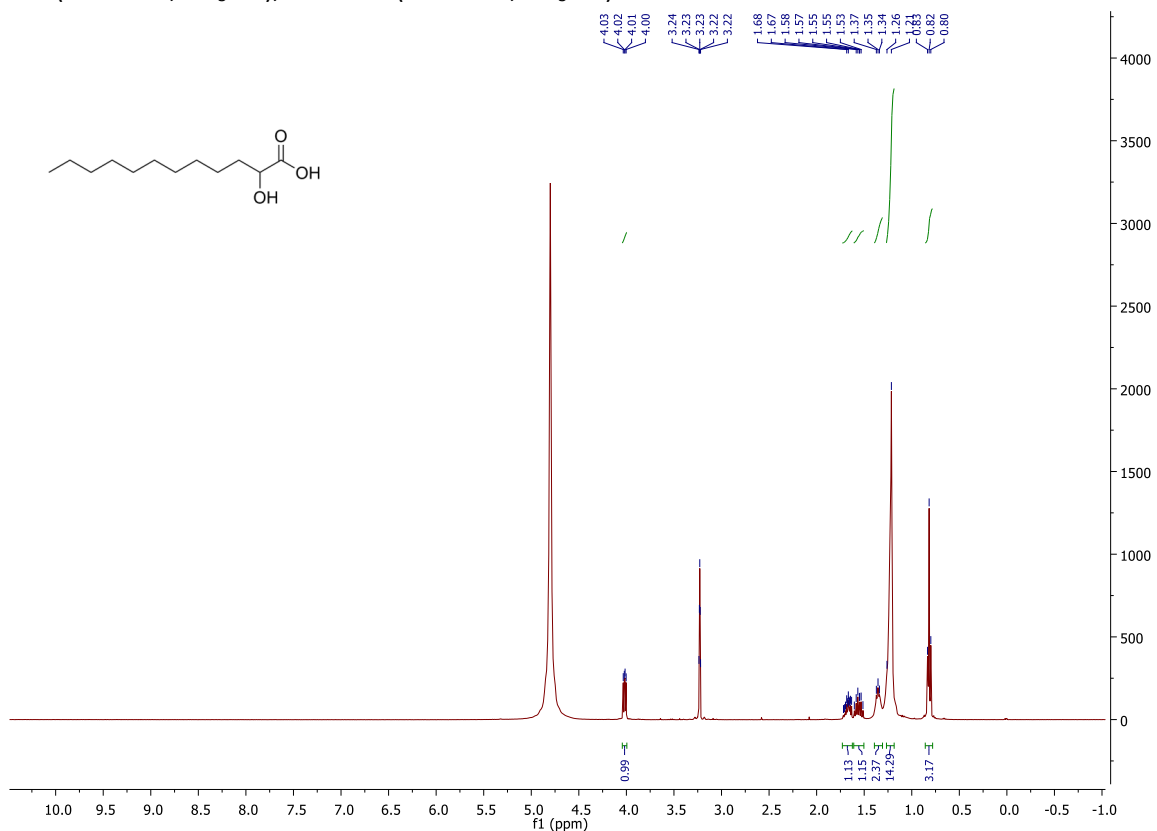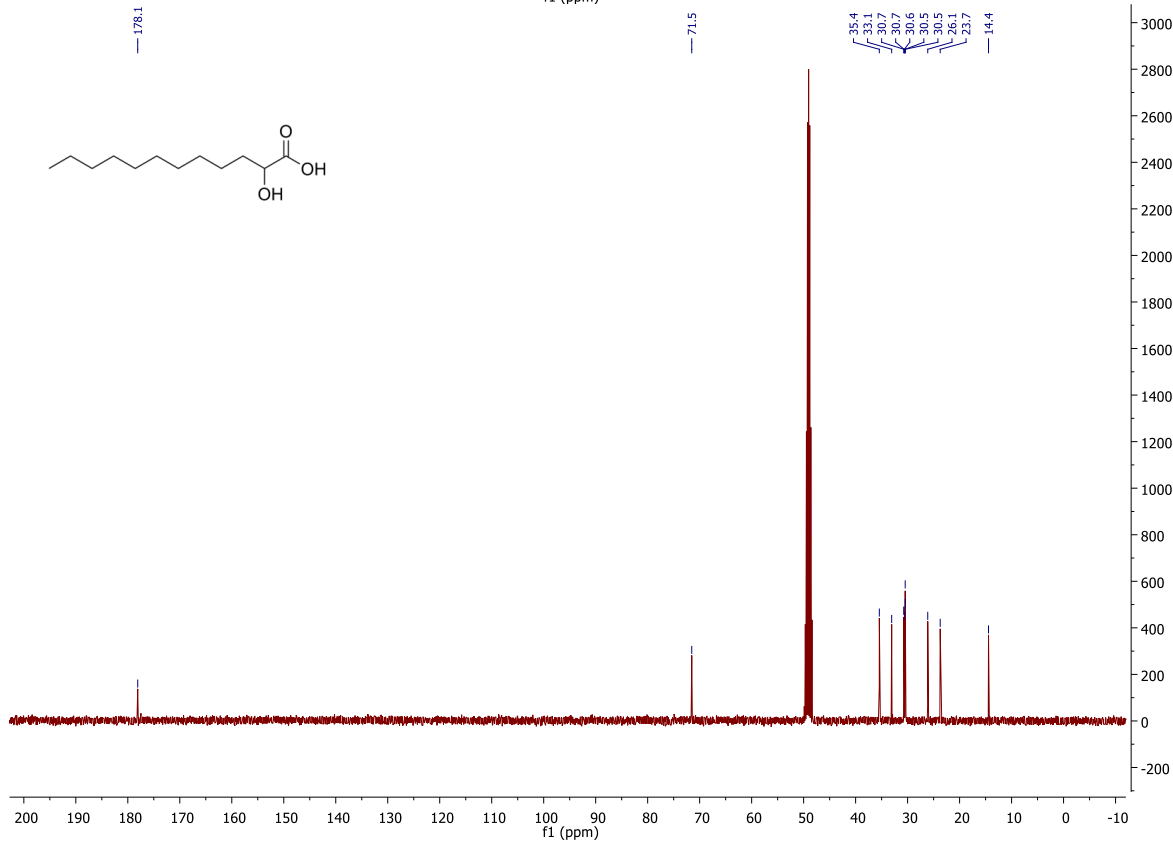

# Ethyl 3-oxolaurate

$^1\text{H}$  NMR (400 MHz,  $\text{CDCl}_3$ ),  $^{13}\text{C}$  NMR (101 MHz,  $\text{CDCl}_3$ )

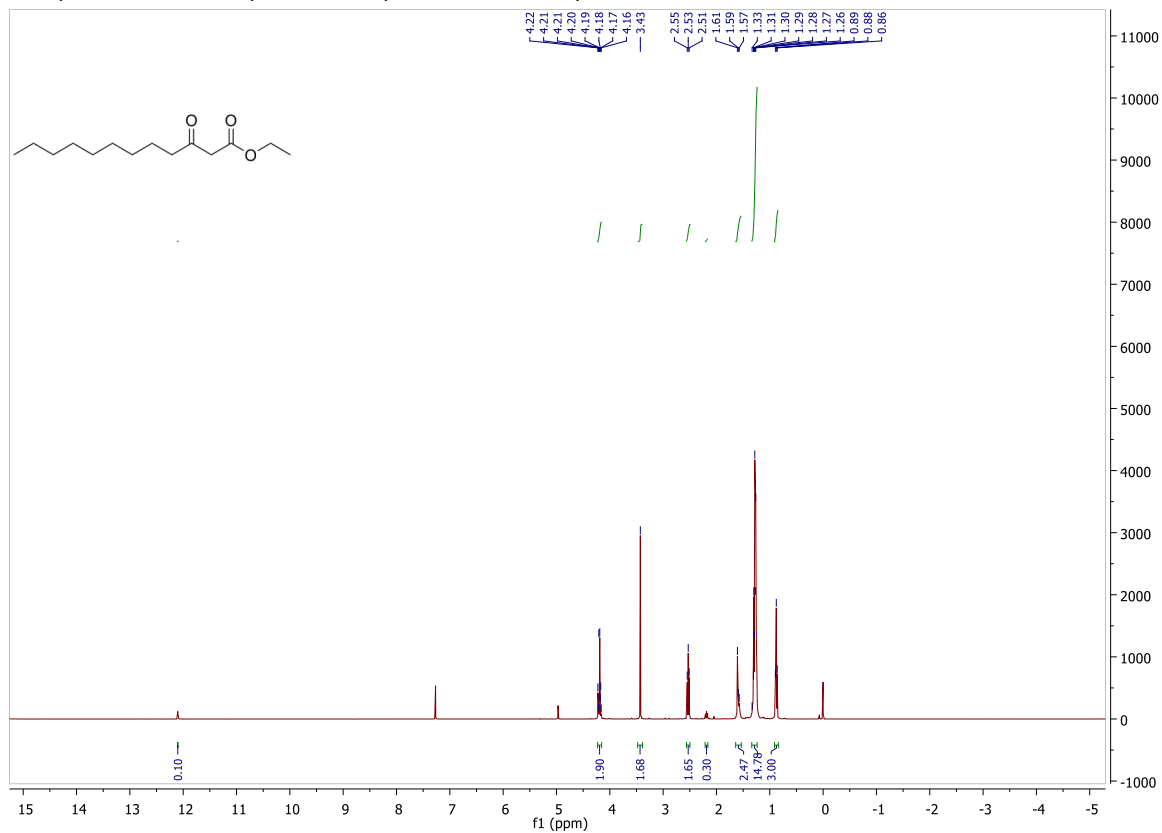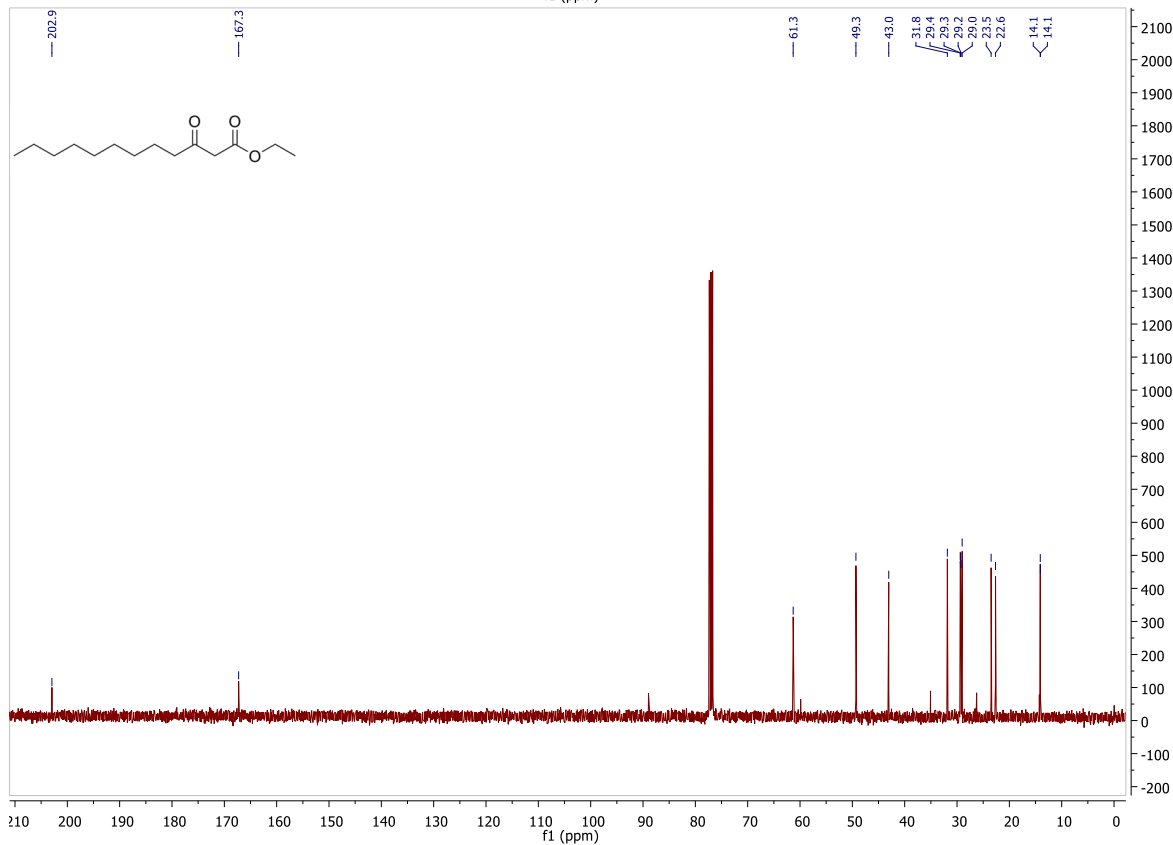

### 3-Hydroxy lauric acid

$^1\text{H}$  NMR (400 MHz,  $\text{CD}_3\text{OD}$ ),  $^{13}\text{C}$  NMR (101 MHz,  $\text{CD}_3\text{OD}$ )

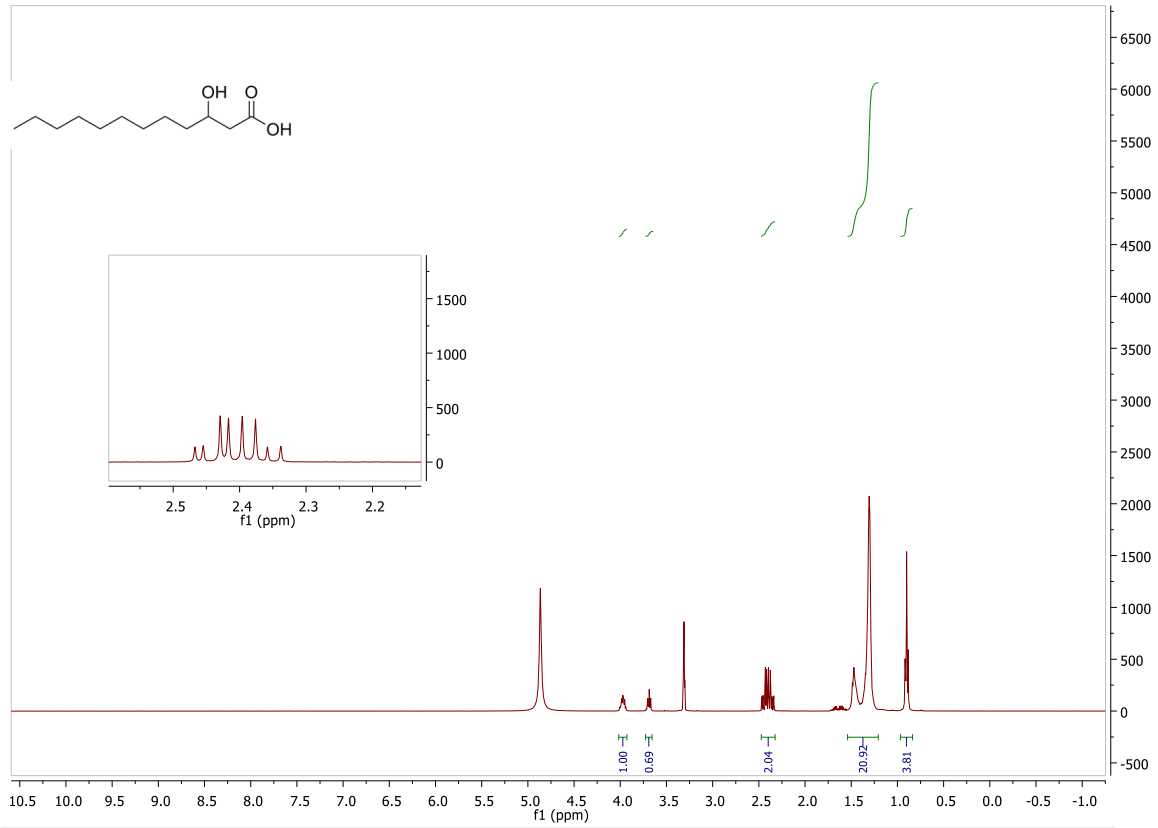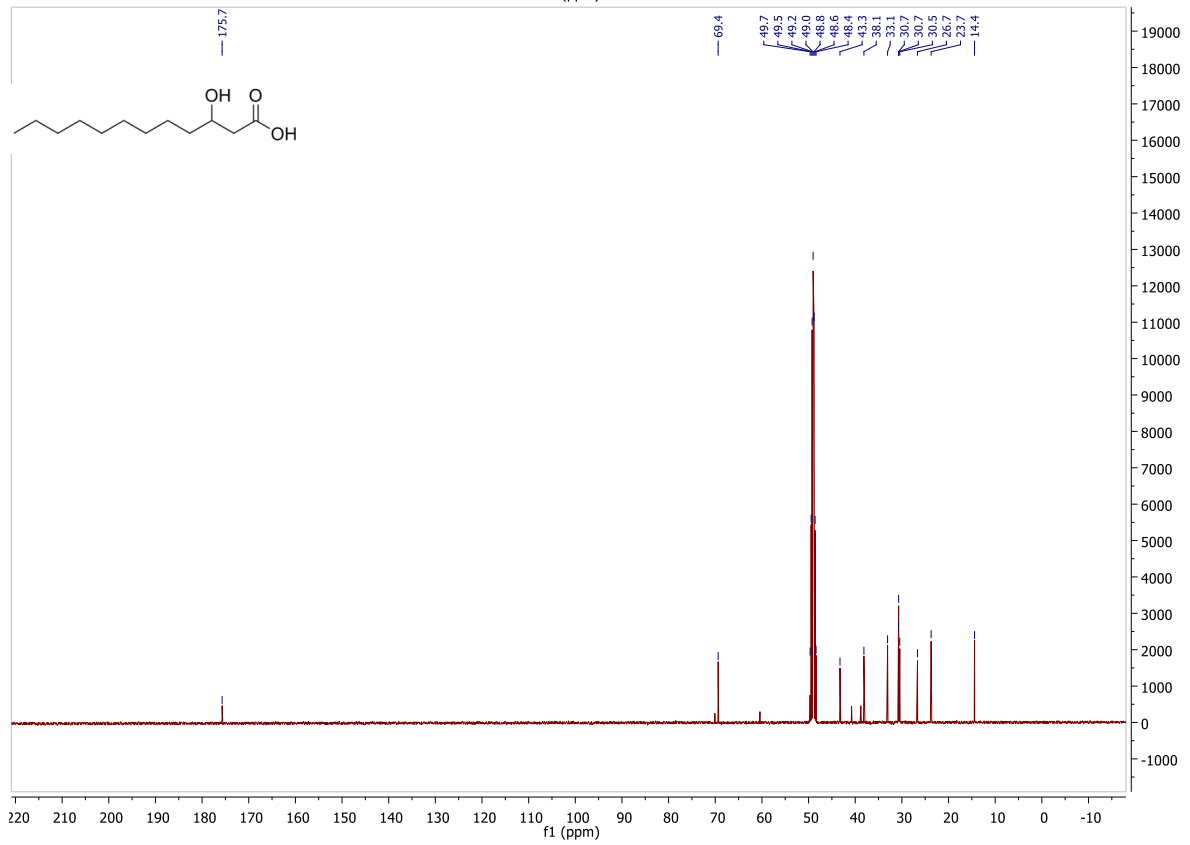



# Sodium 4-hydroxylaurate

$^1\text{H}$  NMR (400 MHz,  $\text{CD}_3\text{OD}$ ),  $^{13}\text{C}$  NMR (101 MHz,  $\text{CD}_3\text{OD}$ )

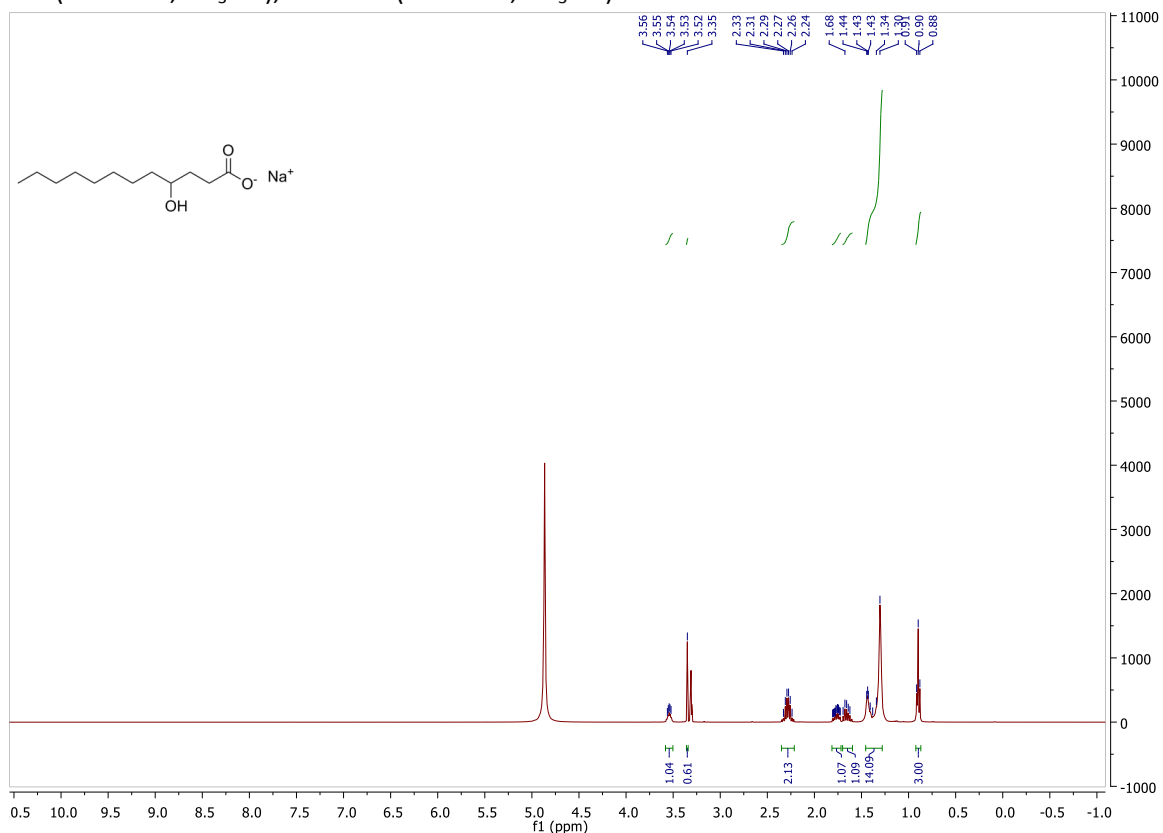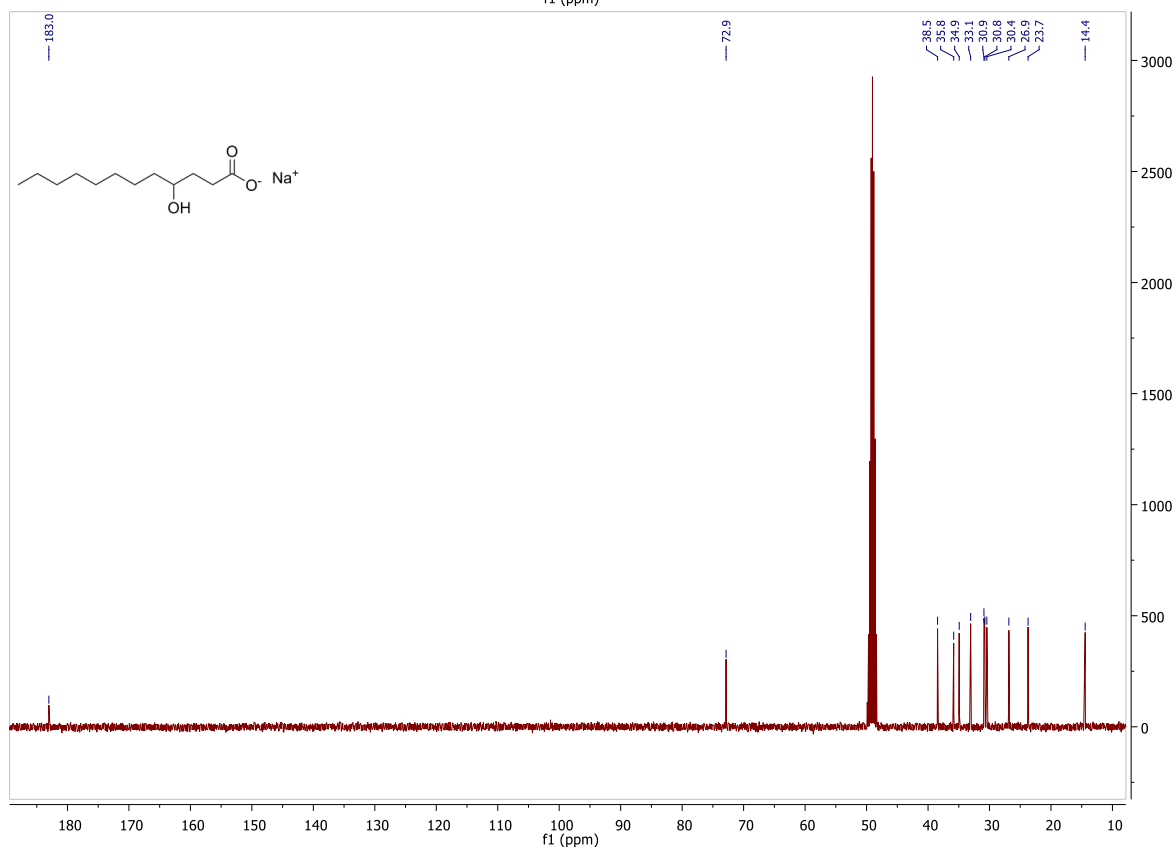

# Sodium 5-hydroxylaurate

$^1\text{H}$  NMR (400 MHz,  $\text{CD}_3\text{OD}$ ),  $^{13}\text{C}$  NMR (101 MHz,  $\text{CD}_3\text{OD}$ )

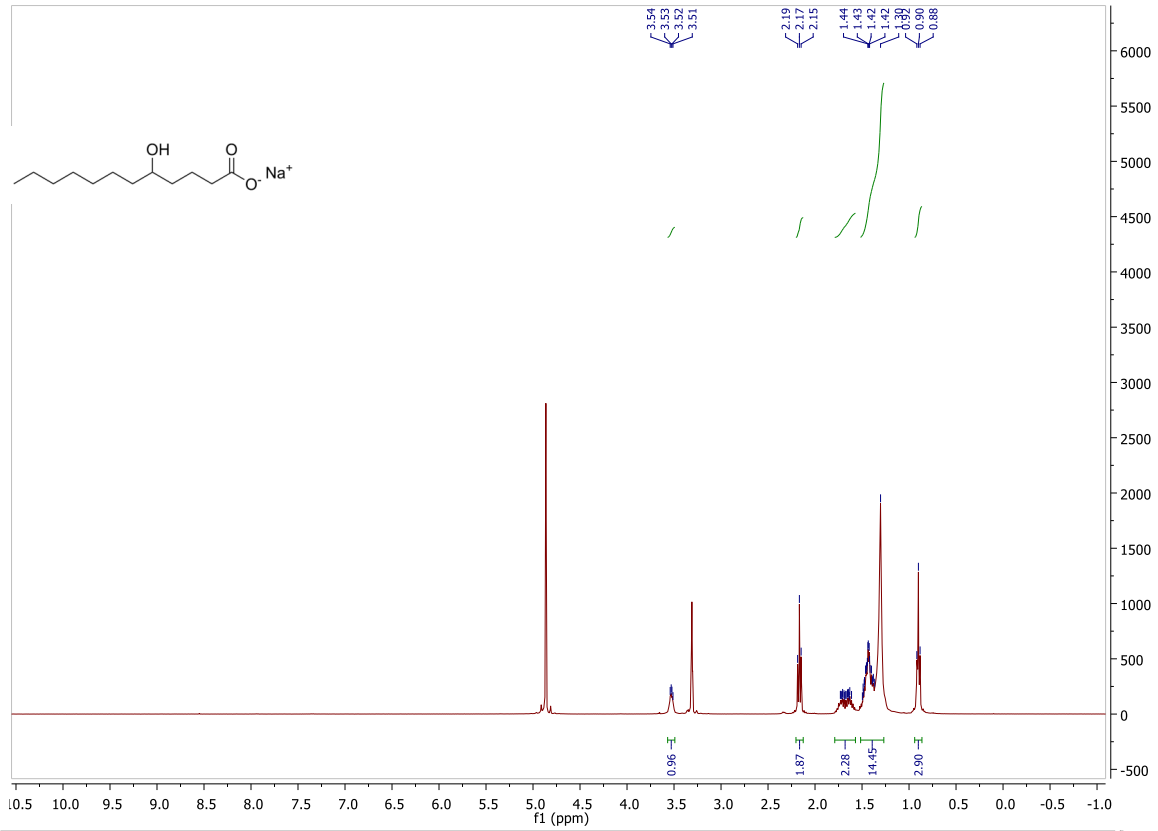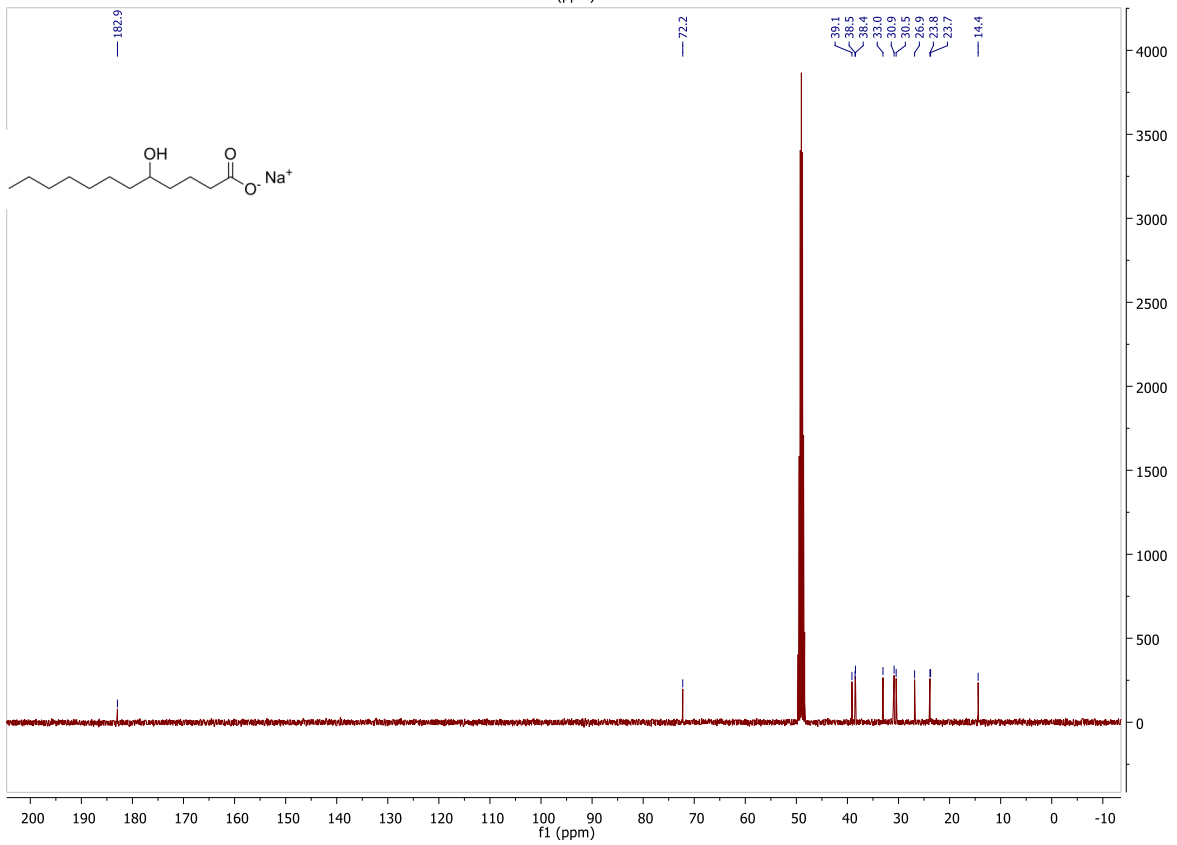

# 6-Hydroxy-4-dodecynoic acid

$^1\text{H}$  NMR (400 MHz,  $\text{CD}_3\text{OD}$ ),  $^{13}\text{C}$  NMR (101 MHz,  $\text{CD}_3\text{OD}$ )

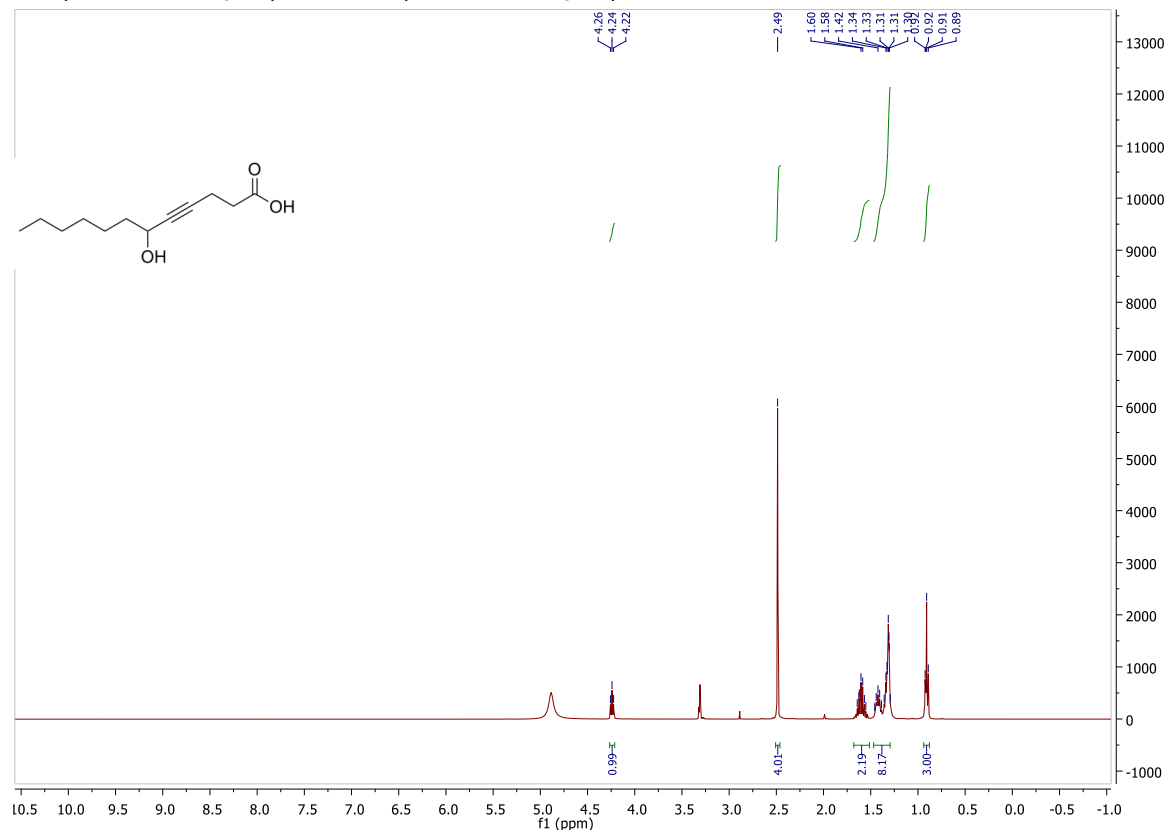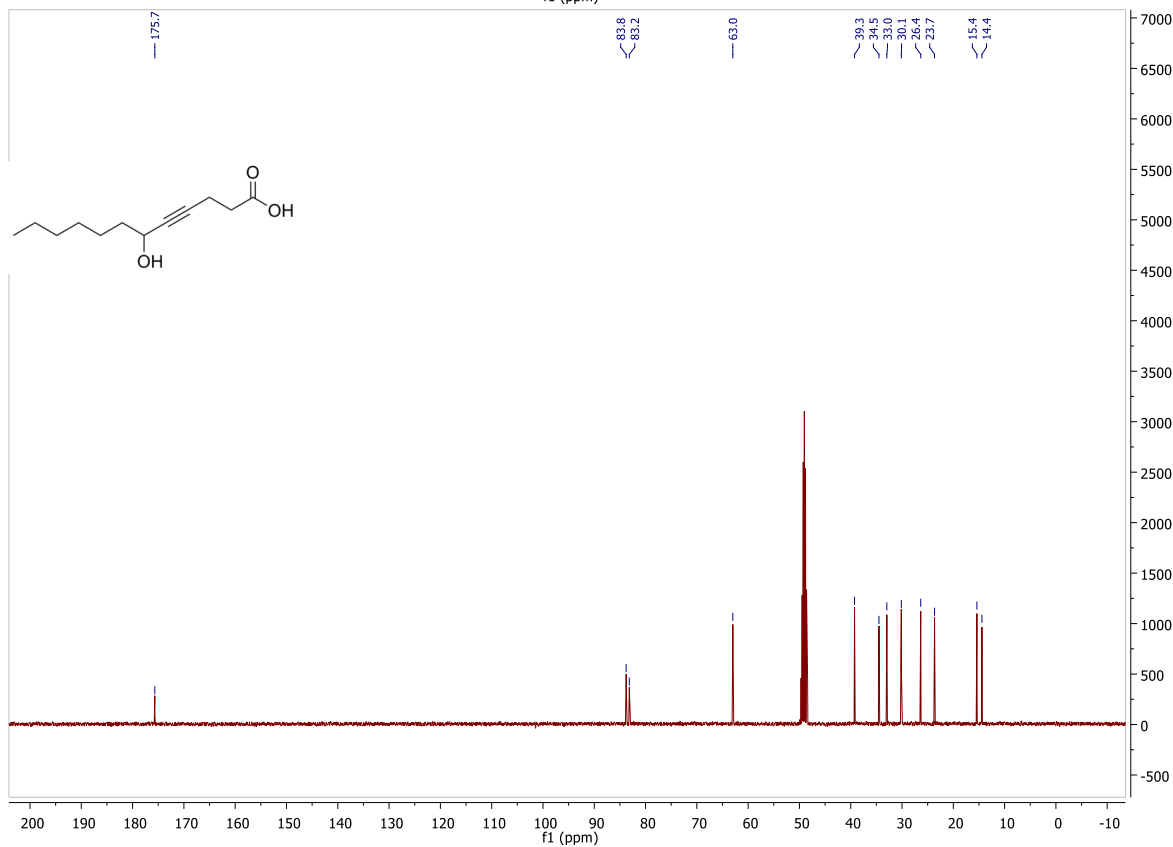

# 6-Hydroxylauric acid

$^1\text{H}$  NMR (400 MHz,  $\text{CD}_3\text{OD}$ ),  $^{13}\text{C}$  NMR (101 MHz,  $\text{CD}_3\text{OD}$ )

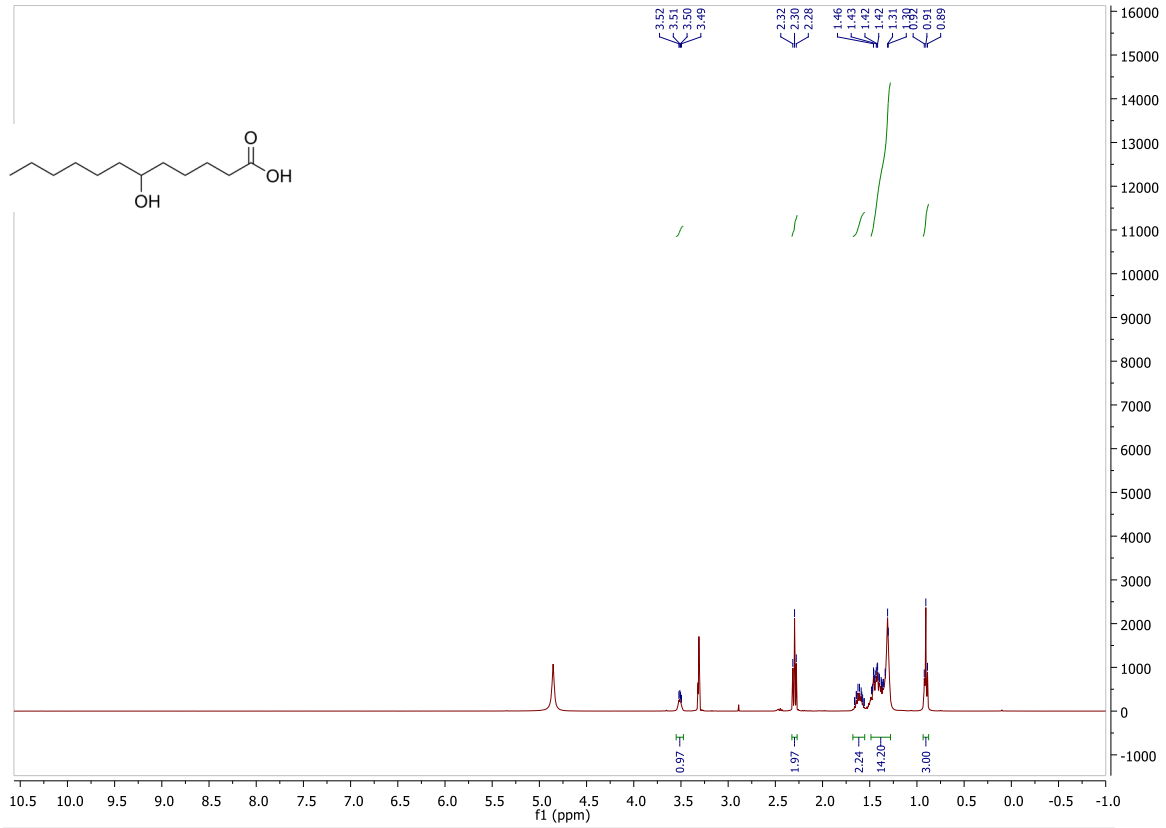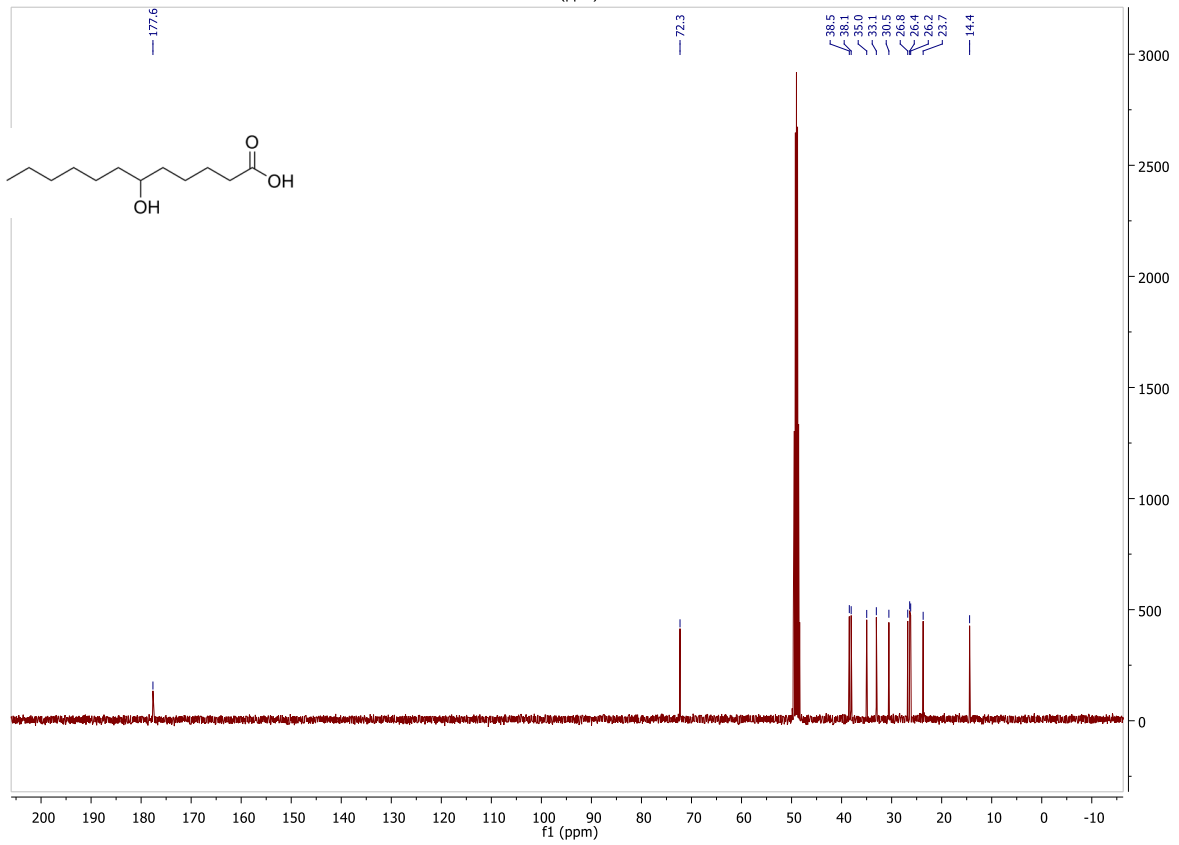

# 7-Hydroxy-5-dodecynoic acid

$^1\text{H}$  NMR (400 MHz,  $\text{CDCl}_3$ ),  $^{13}\text{C}$  NMR (101 MHz,  $\text{CDCl}_3$ )

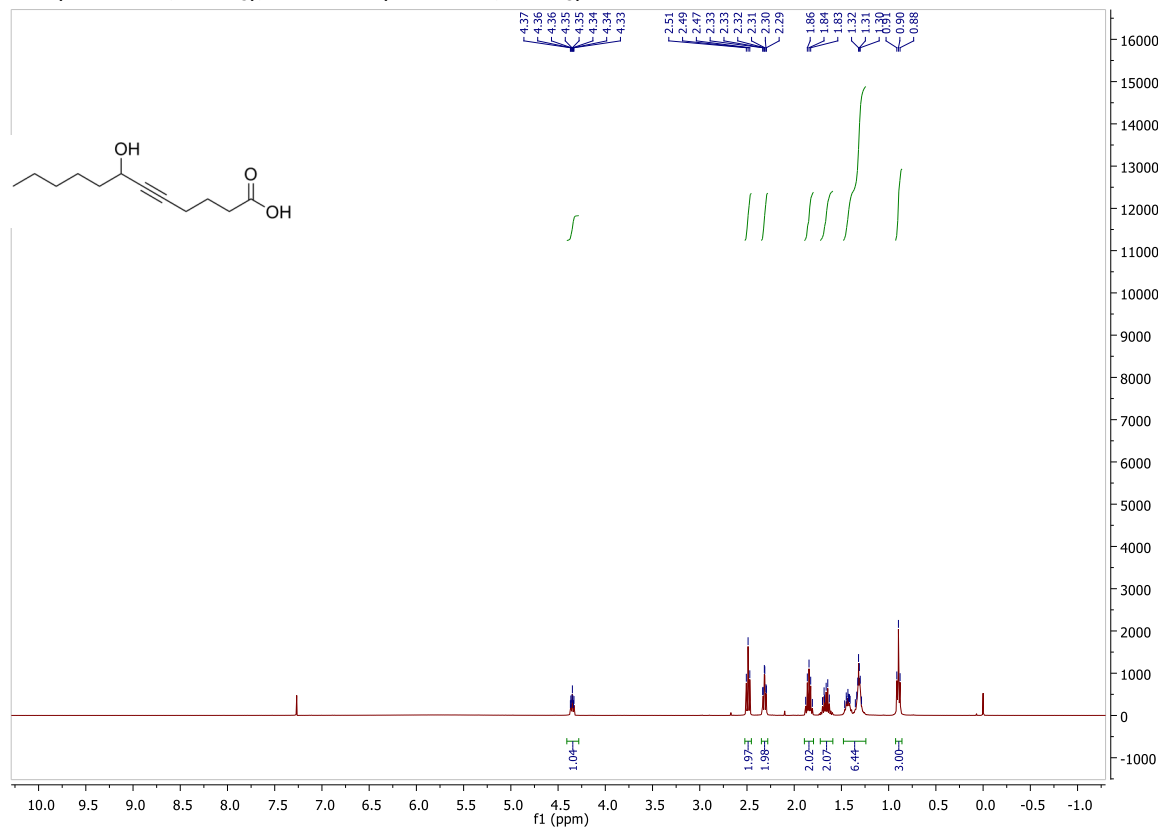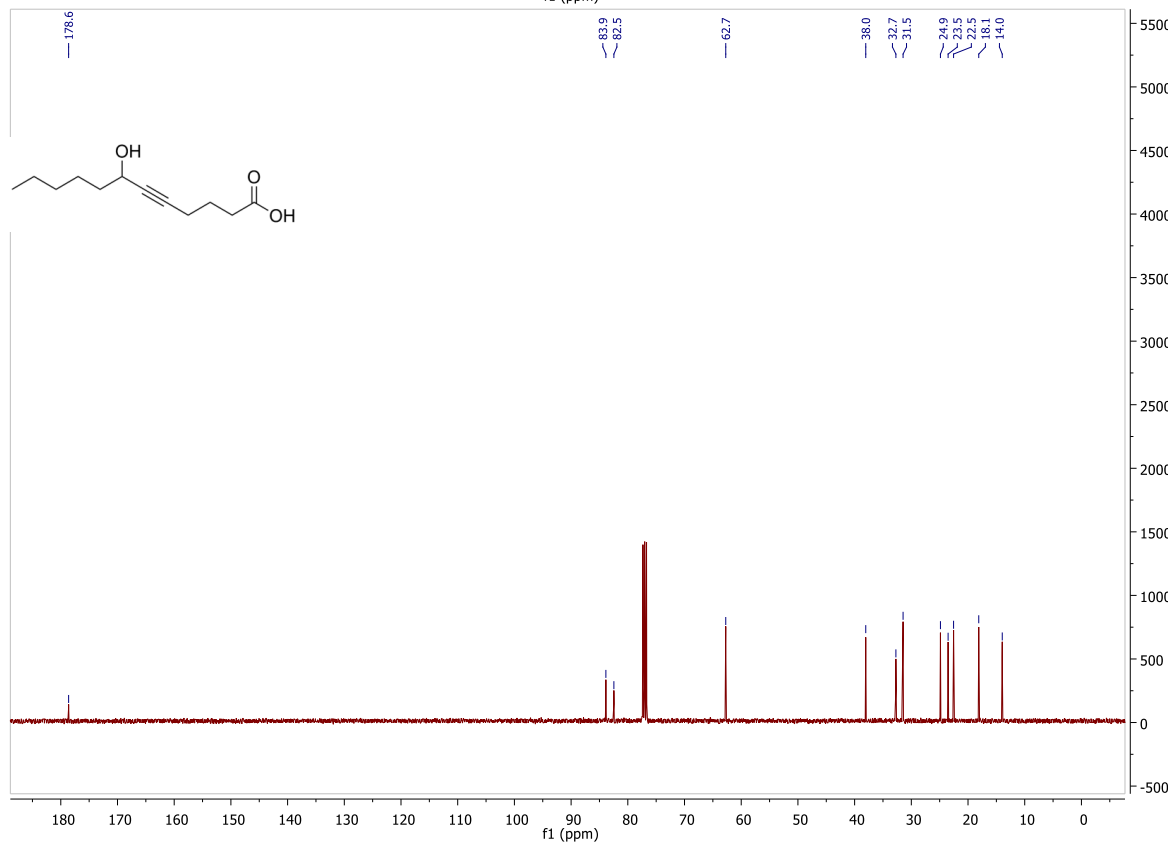

# 7-Hydroxylauric acid

$^1\text{H}$  NMR (400 MHz,  $\text{CD}_3\text{OD}$ ),  $^{13}\text{C}$  NMR (101 MHz,  $\text{CD}_3\text{OD}$ )

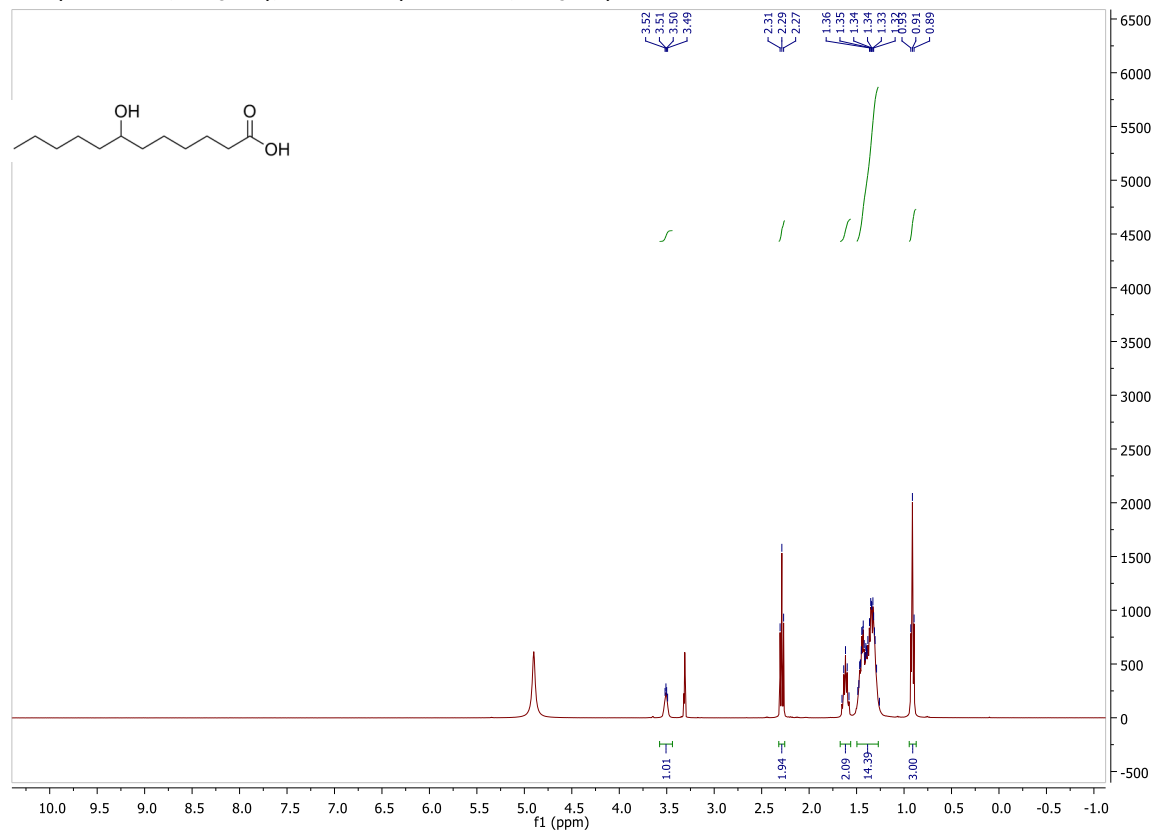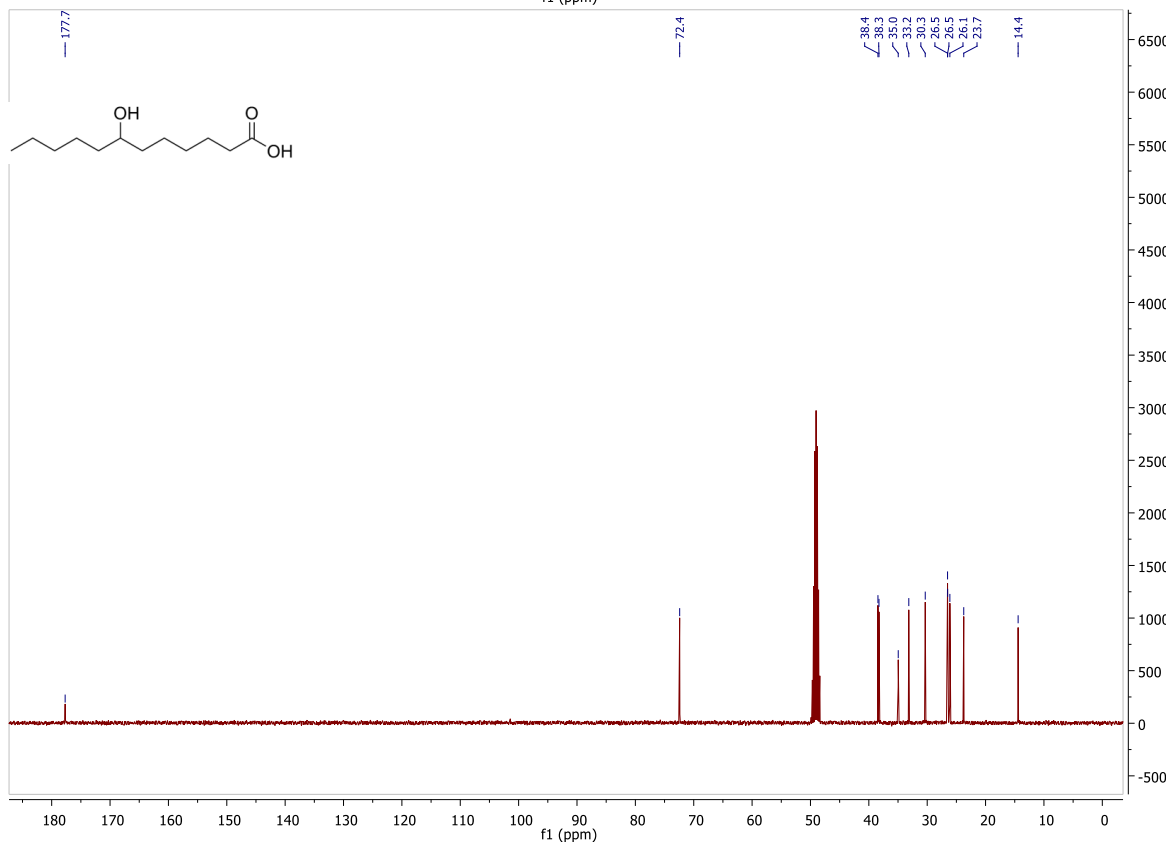

# 8-Hydroxy-6-dodecynoic acid

$^1\text{H}$  NMR (400 MHz,  $\text{CDCl}_3$ ),  $^{13}\text{C}$  NMR (101 MHz,  $\text{CDCl}_3$ )

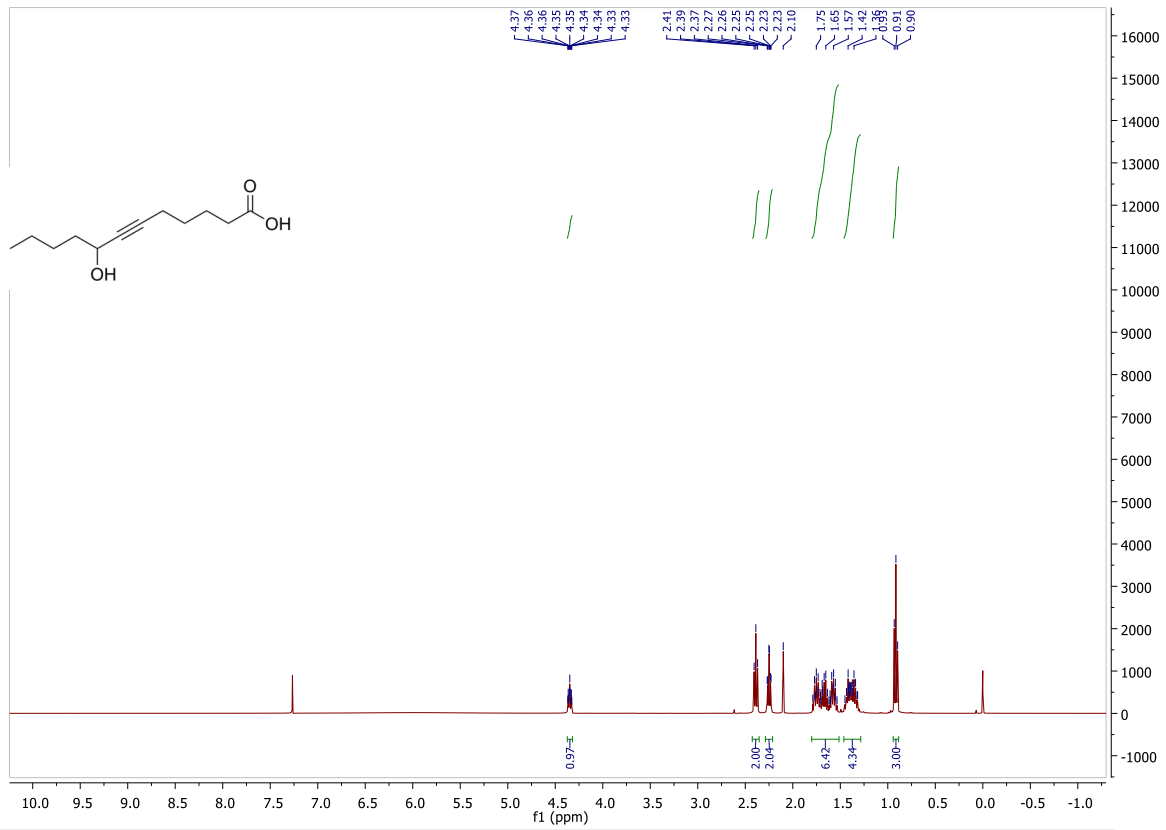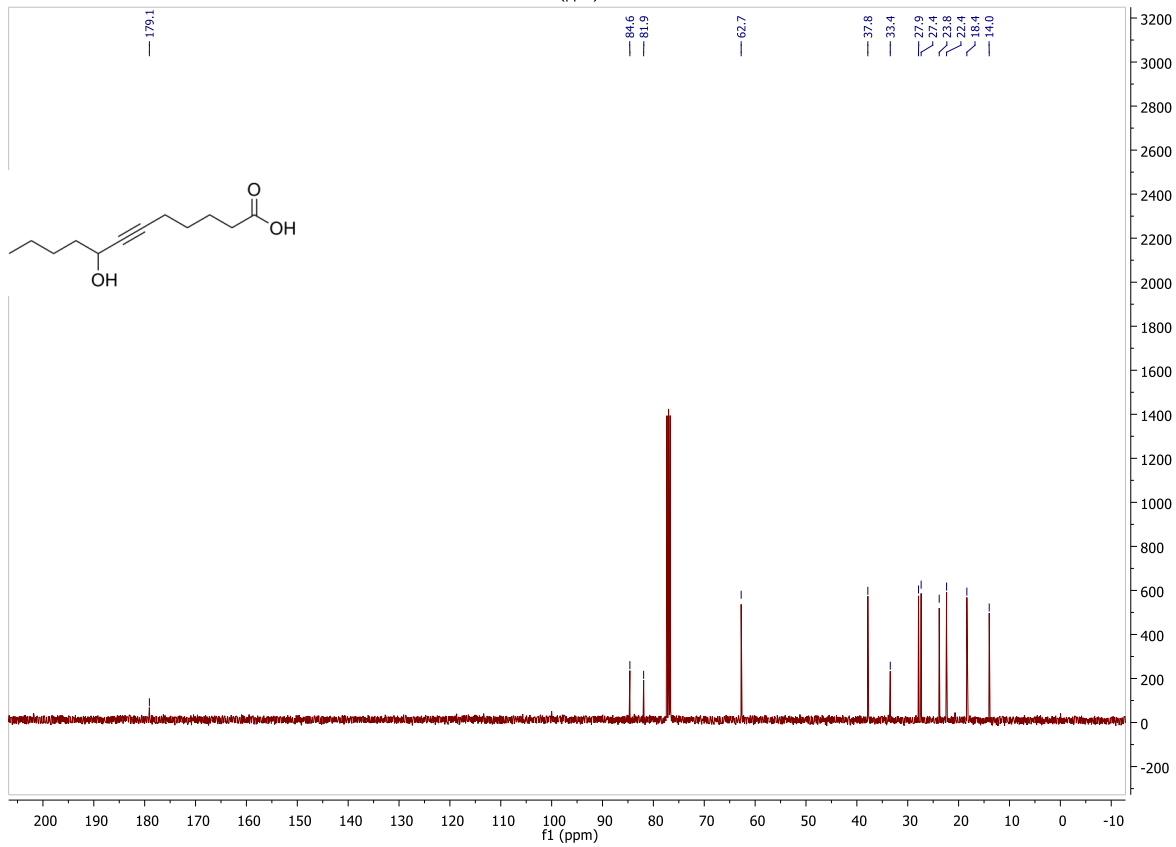

# 8-Hydroxylauric acid

$^1\text{H}$  NMR (400 MHz,  $\text{CD}_3\text{OD}$ ),  $^{13}\text{C}$  NMR (101 MHz,  $\text{CD}_3\text{OD}$ )

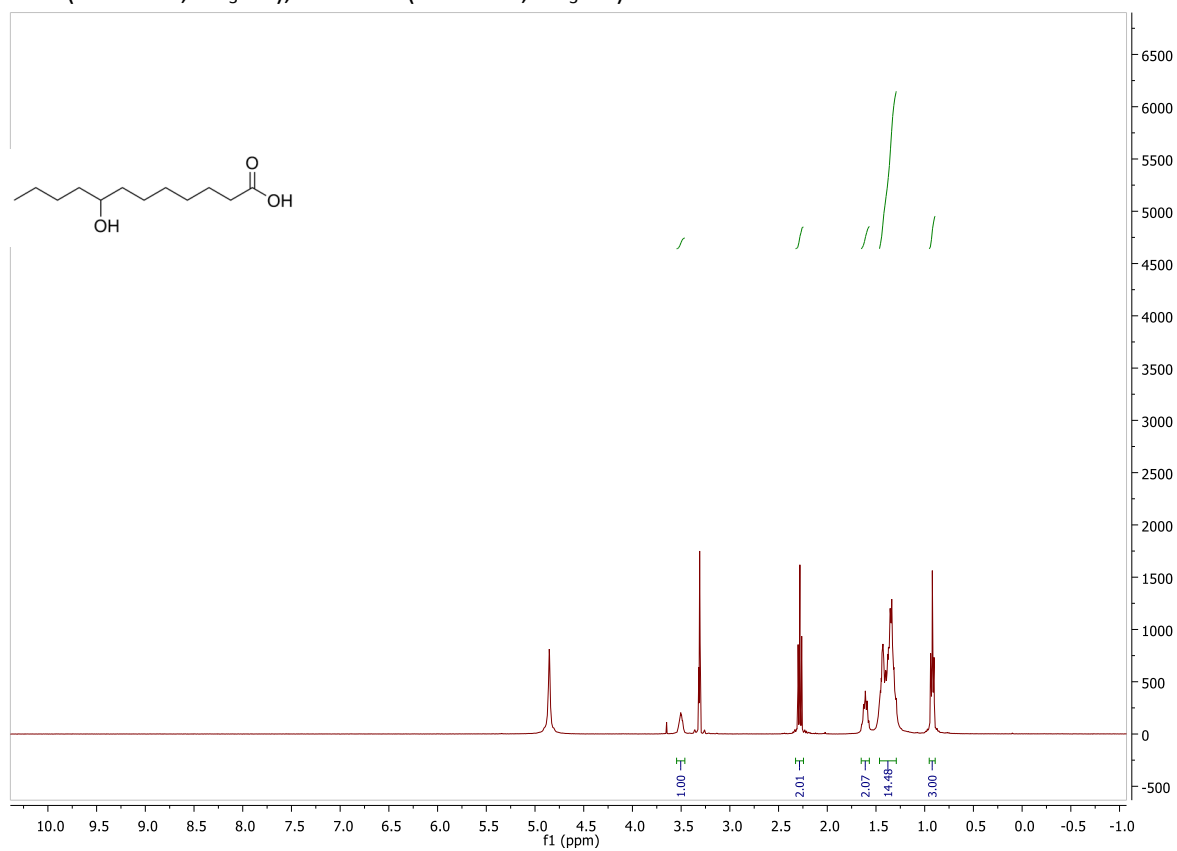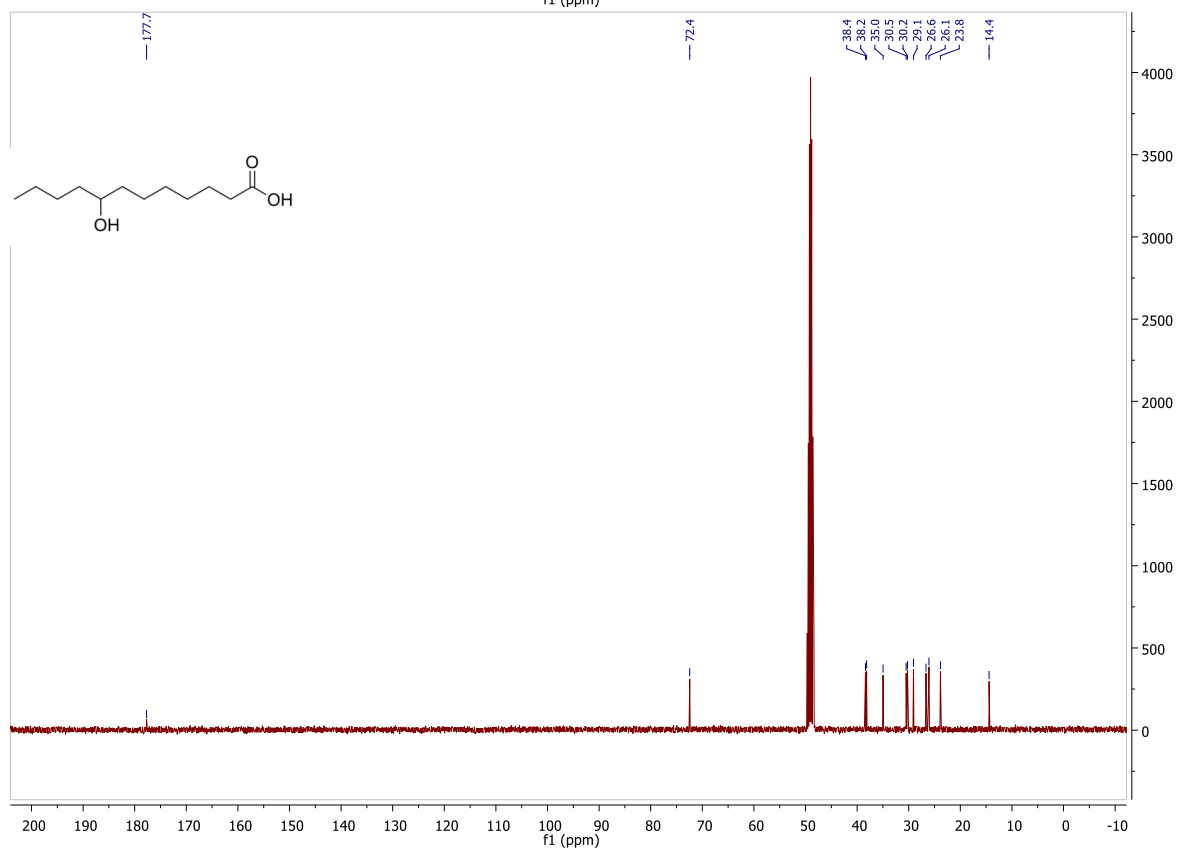



# 9-Hydroxy-7-dodecynoic acid

$^1\text{H}$  NMR (400 MHz,  $\text{CDCl}_3$ ),  $^{13}\text{C}$  NMR (101 MHz,  $\text{CDCl}_3$ )

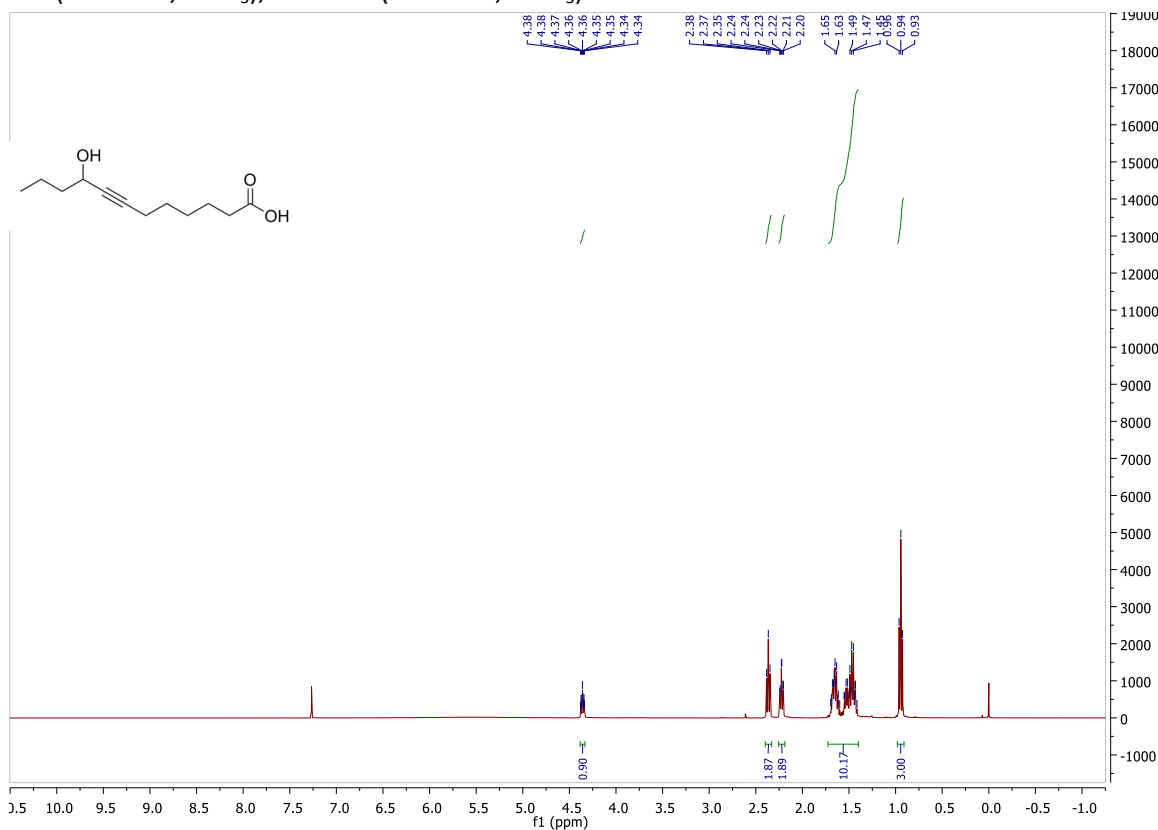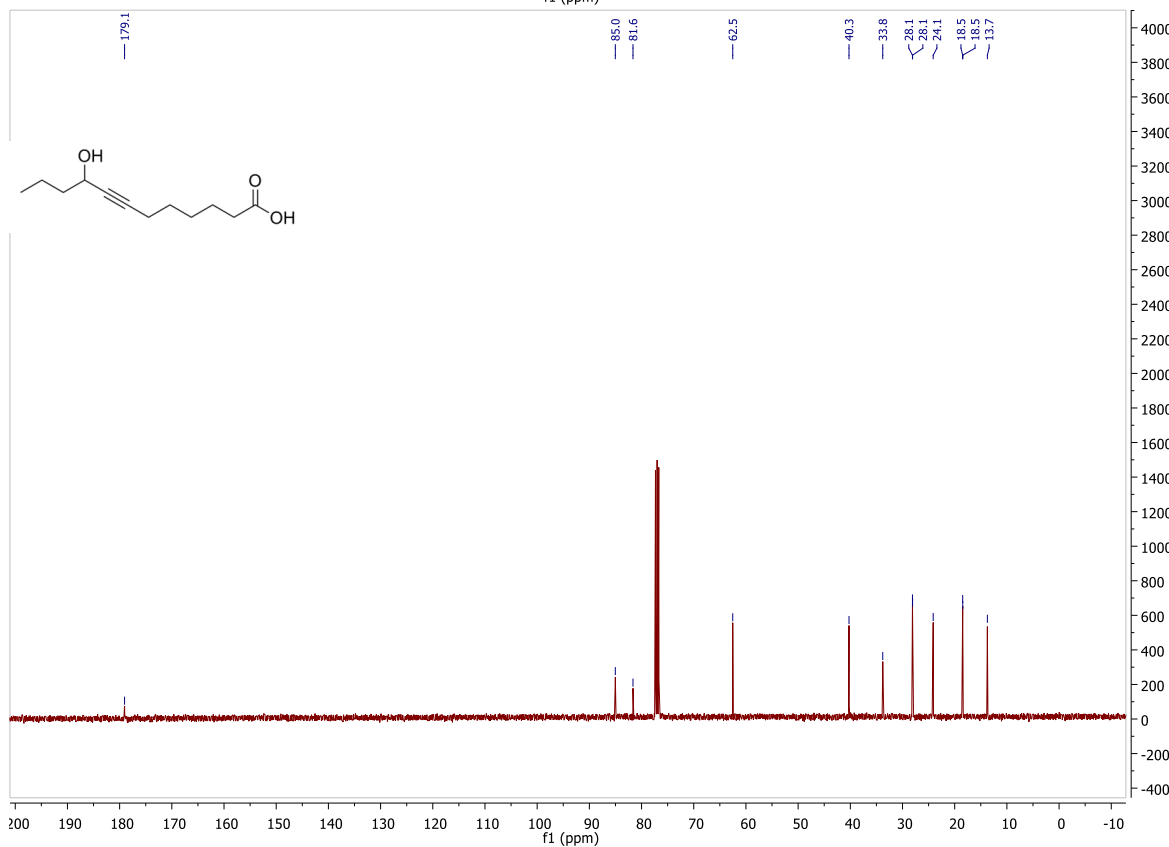

# 9-Hydroxylauric acid

$^1\text{H}$  NMR (400 MHz,  $\text{CD}_3\text{OD}$ ),  $^{13}\text{C}$  NMR (101 MHz,  $\text{CD}_3\text{OD}$ )

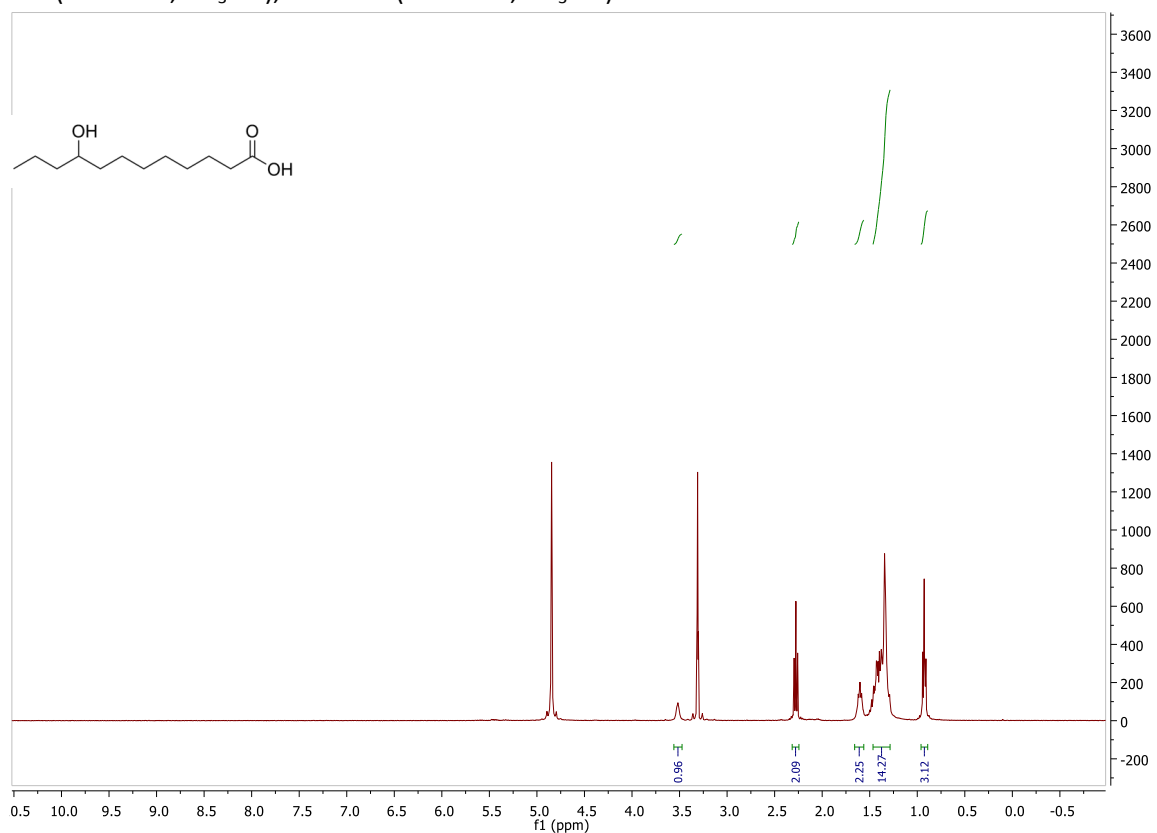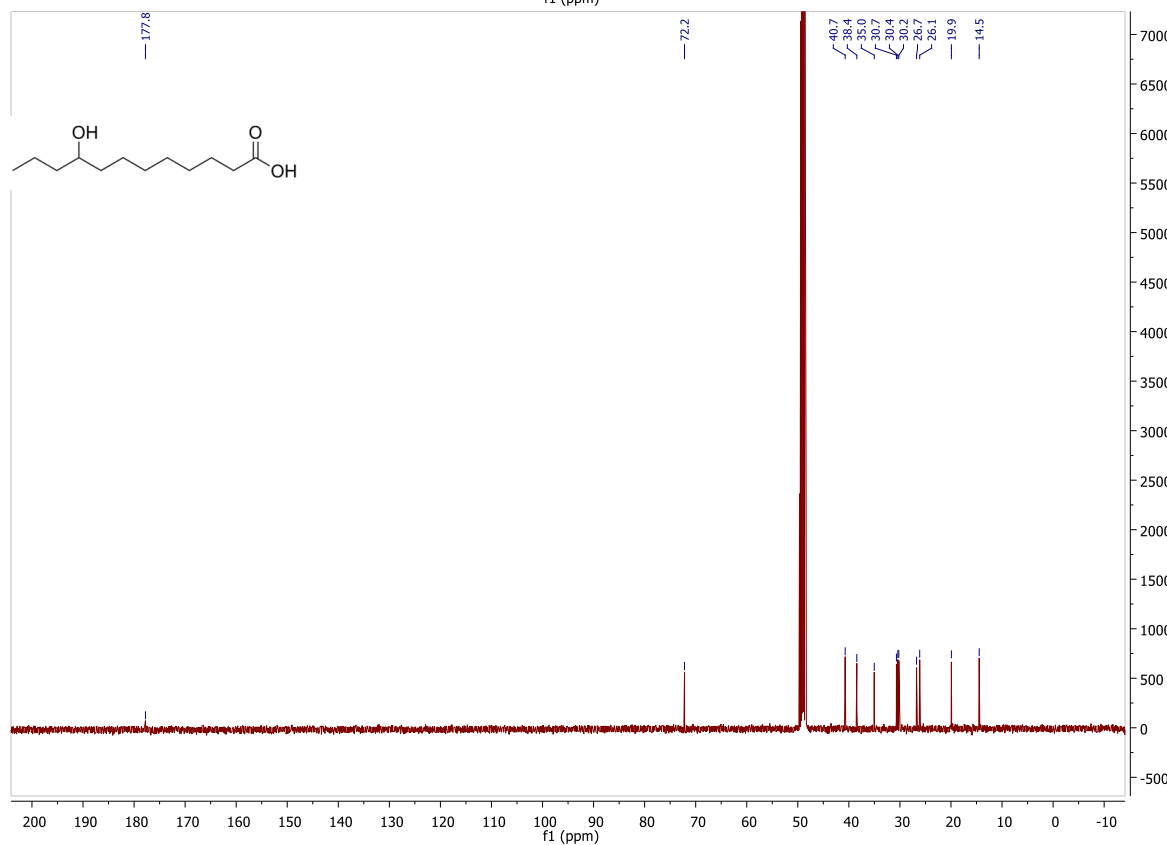

# 10-Hydroxy-8-dodecynoic acid

$^1\text{H}$  NMR (400 MHz,  $\text{CD}_3\text{OD}$ ),  $^{13}\text{C}$  NMR (101 MHz,  $\text{CD}_3\text{OD}$ )

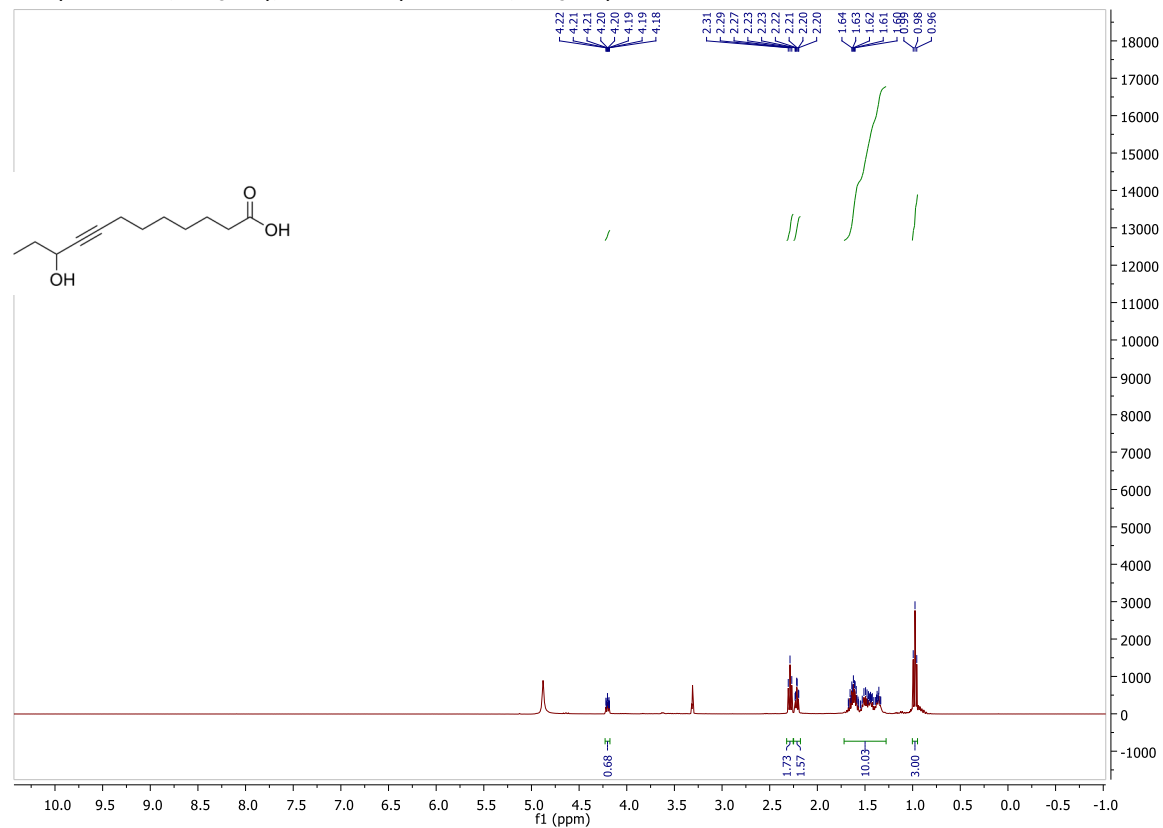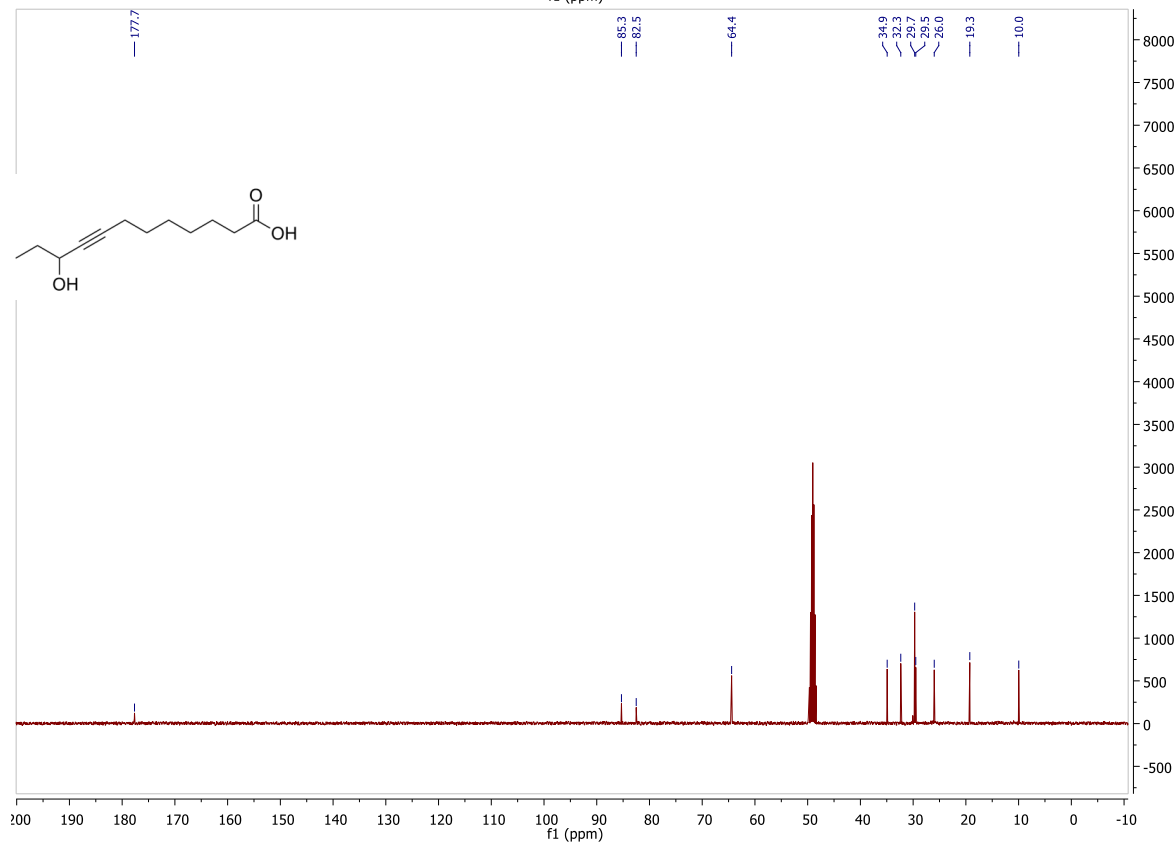

# 10-Hydroxylauric acid

$^1\text{H}$  NMR (400 MHz,  $\text{CD}_3\text{OD}$ ),  $^{13}\text{C}$  NMR (101 MHz,  $\text{CD}_3\text{OD}$ )

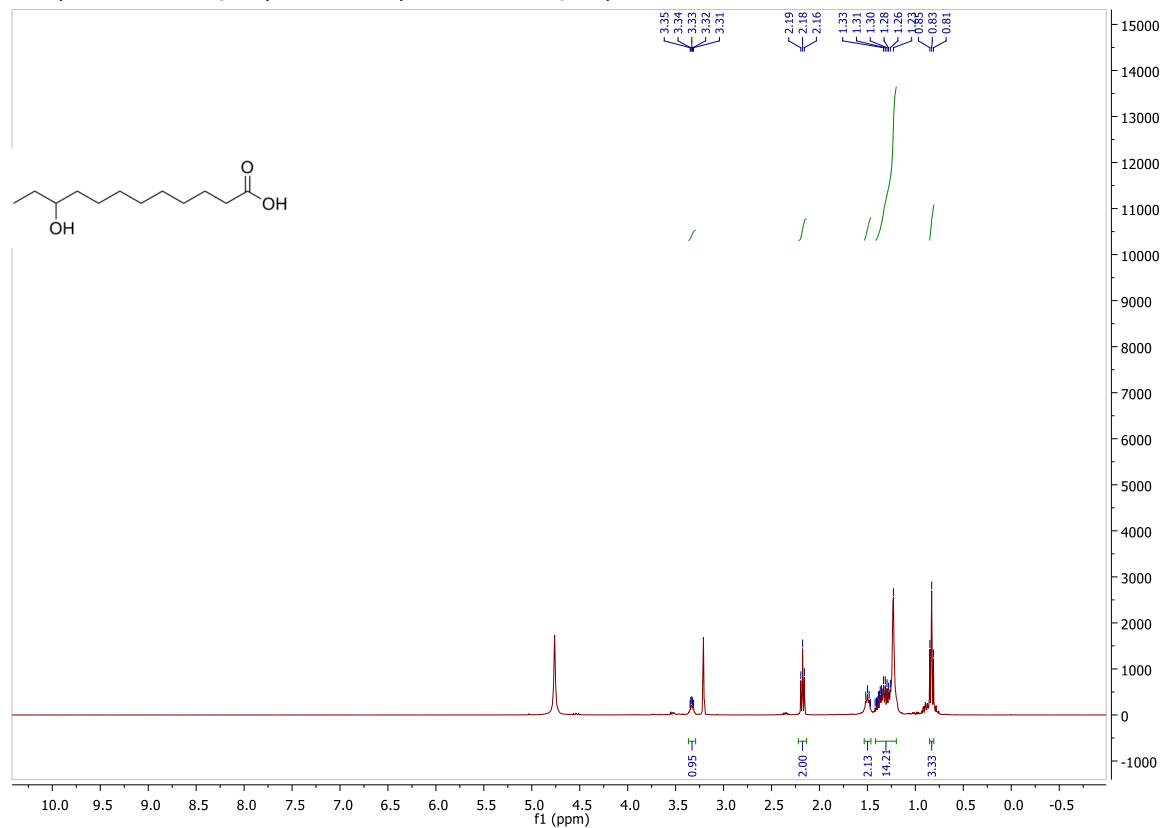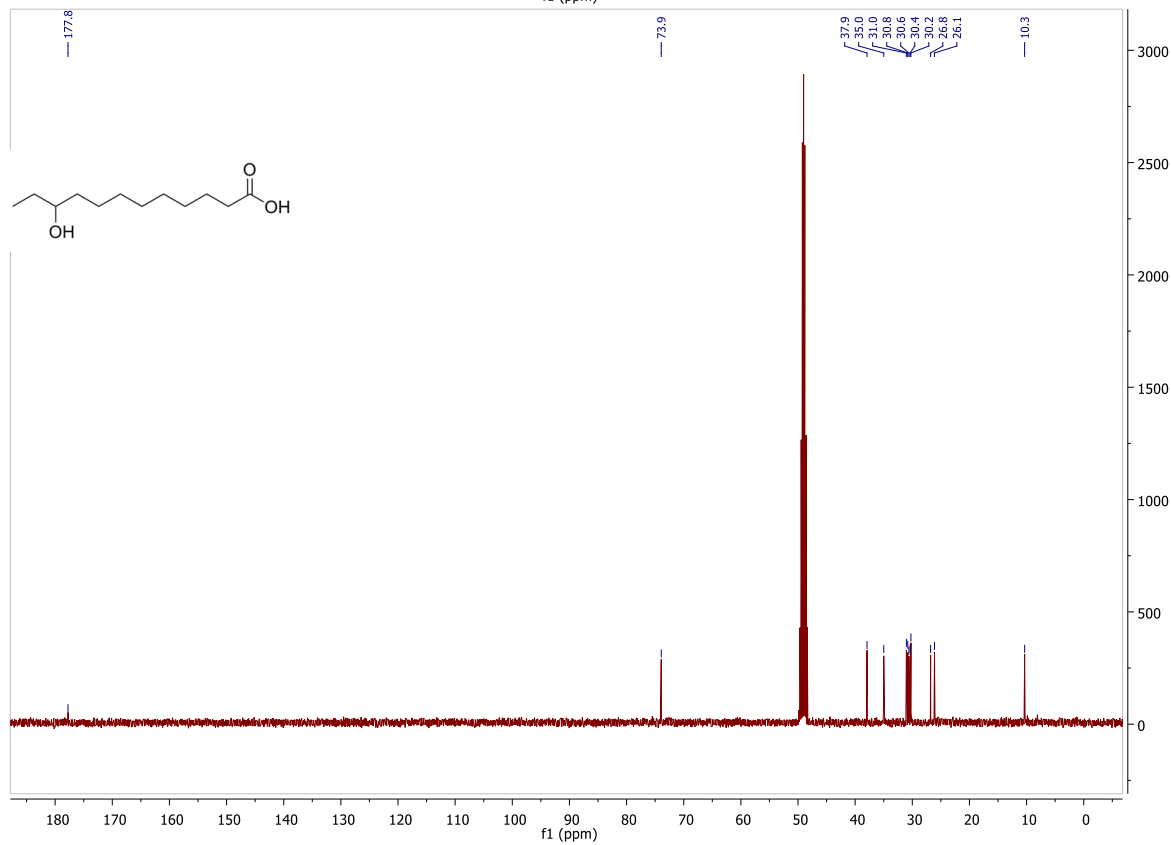

# 11-Hydroxy-9-dodecynoic acid

$^1\text{H}$  NMR (400 MHz,  $\text{CDCl}_3$ ),  $^{13}\text{C}$  NMR (101 MHz,  $\text{CDCl}_3$ )

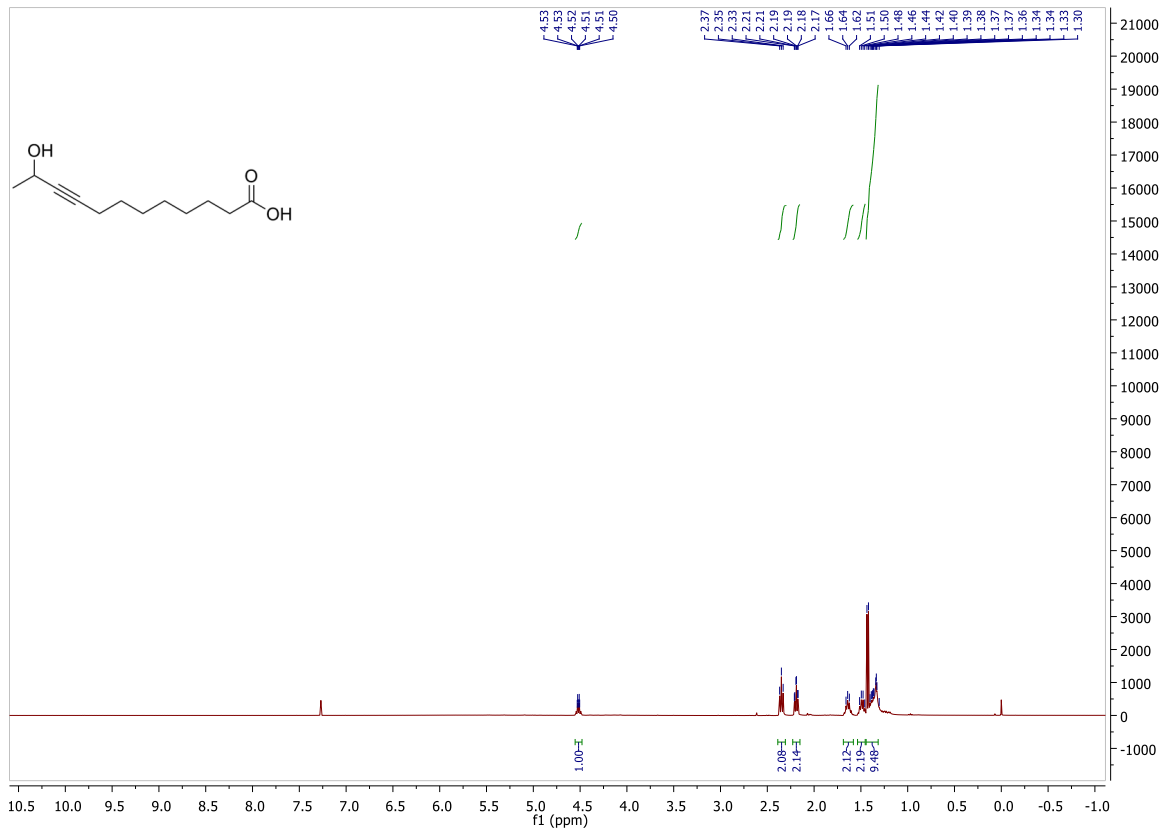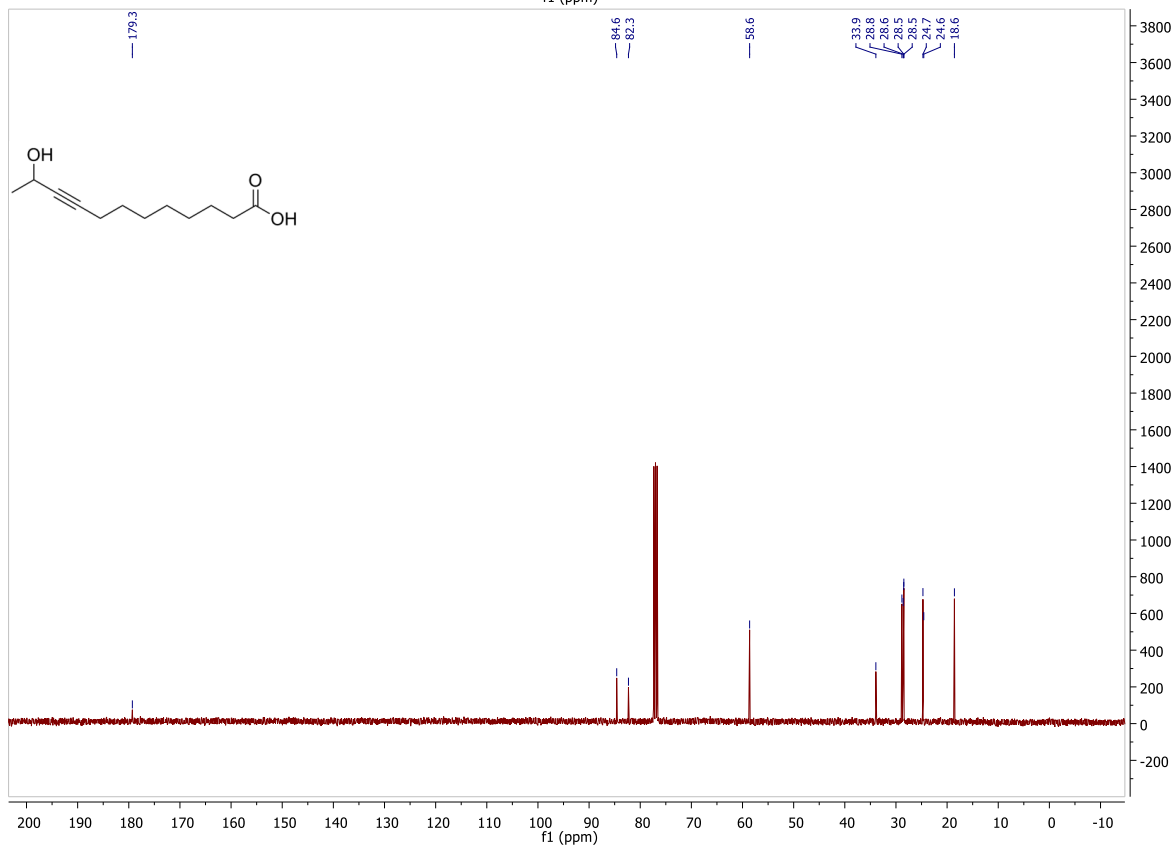

# 11-Hydroxylauric acid

$^1\text{H}$  NMR (400 MHz,  $\text{CD}_3\text{OD}$ ),  $^{13}\text{C}$  NMR (101 MHz,  $\text{CD}_3\text{OD}$ )

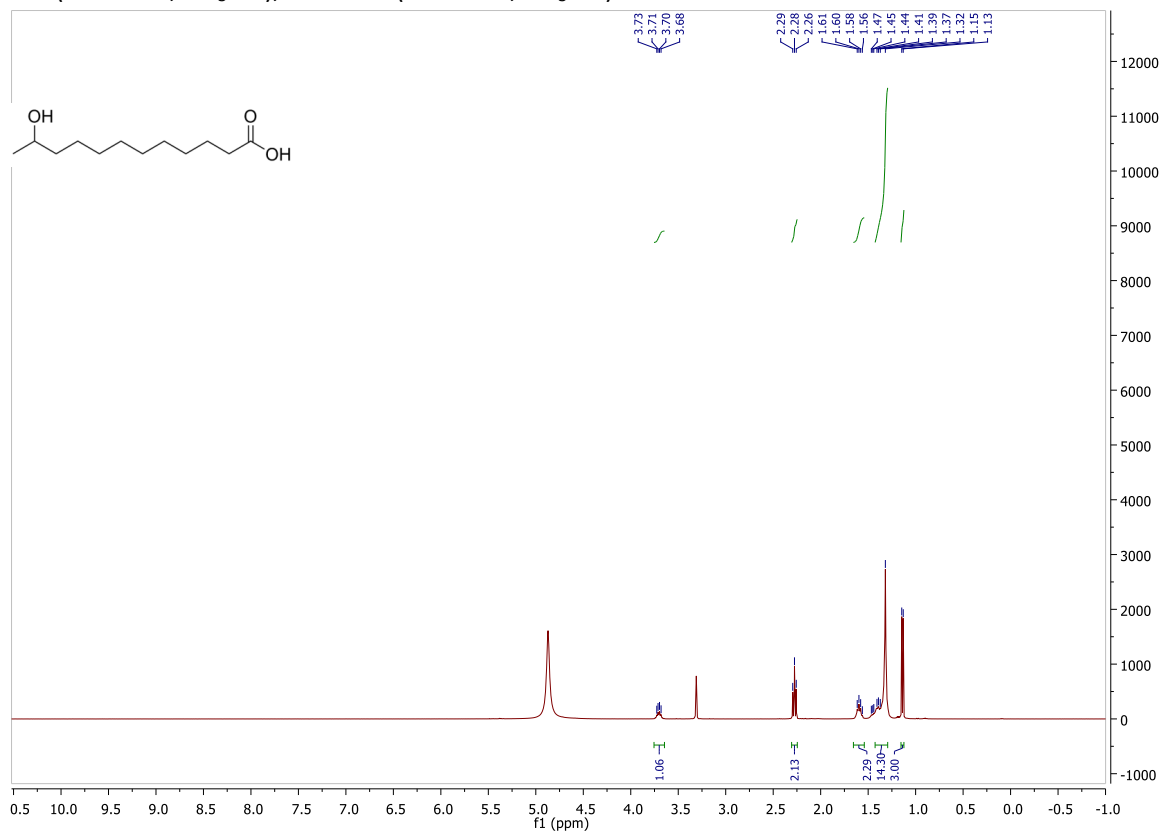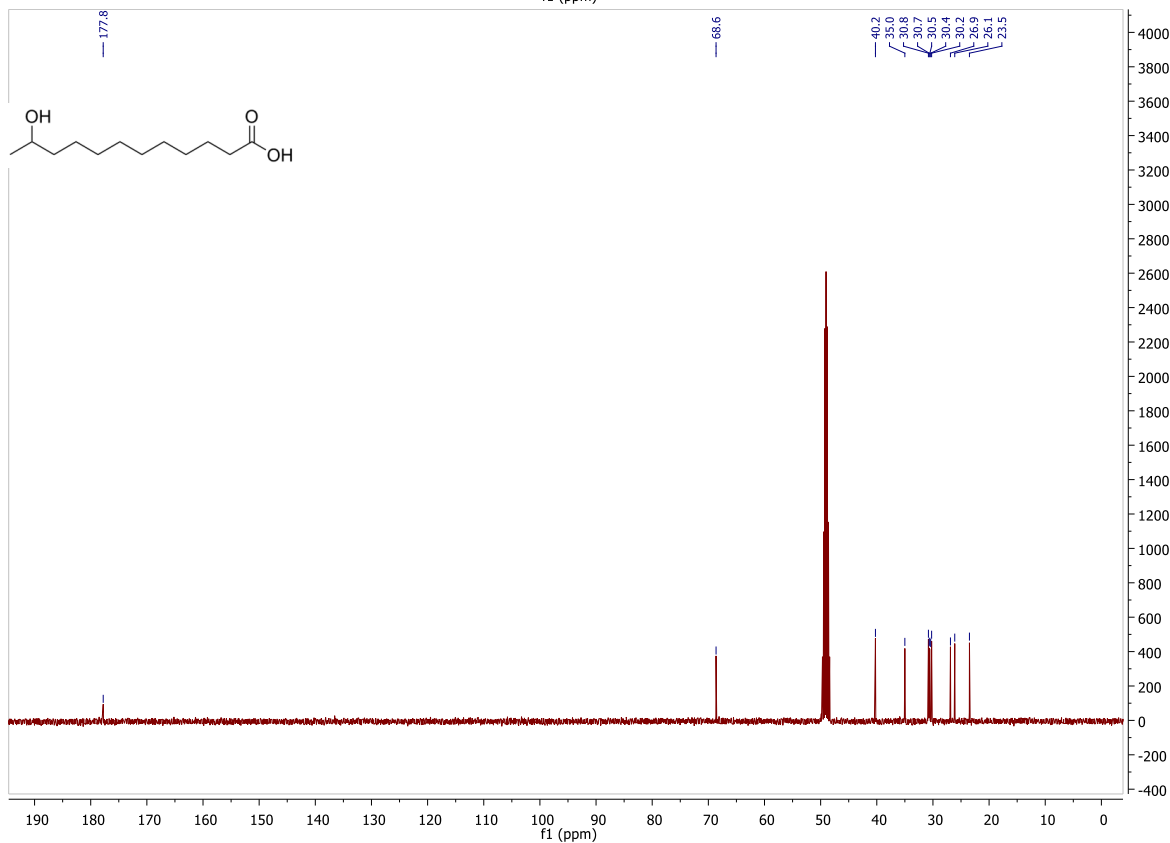

Supplement: MD-008-C7MD00130D-s001.pdf [file MD-008-C7MD00130D-s001.pdf]
